# Supplementary material for: A cross-sectional study of all clinicians’ conflict of interest disclosures to NHS hospital employers in England 2015-2016
Source: PubMed Central journal article supplement — BMJ Open. 2018 Mar 5;8(3):e019952. doi: 10.1136/bmjopen-2017-019952 (PMC5875639; doi:10.1136/bmjopen-2017-019952), 2018-03-05
Supplement: bmjopen-2017-019952.draft_revisions.pdf [file bmjopen-2017-019952.draft_revisions.pdf]

# BMJ Open

BMJ Open is committed to open peer review. As part of this commitment we make the peer review history of every article we publish publicly available.

When an article is published we post the peer reviewers' comments and the authors' responses online. We also post the versions of the paper that were used during peer review. These are the versions that the peer review comments apply to.

The versions of the paper that follow are the versions that were submitted during the peer review process. They are not the versions of record or the final published versions. They should not be cited or distributed as the published version of this manuscript.

BMJ Open is an open access journal and the full, final, typeset and author-corrected version of record of the manuscript is available on our site with no access controls, subscription charges or pay-per-view fees (<http://bmjopen.bmj.com>).

If you have any questions on BMJ Open's open peer review process please email [editorial.bmjopen@bmj.com](mailto:editorial.bmjopen@bmj.com)

# BMJ Open

## A Cross-Sectional Study of All Clinicians' Conflict of Interest Disclosures to NHS Hospital Employers in England 2015-2016

|                                                                                                                                                                                                                            |                                                                                                                                                                                                                                                                                                                                                                   |
|----------------------------------------------------------------------------------------------------------------------------------------------------------------------------------------------------------------------------|-------------------------------------------------------------------------------------------------------------------------------------------------------------------------------------------------------------------------------------------------------------------------------------------------------------------------------------------------------------------|
| Journal:                                                                                                                                                                                                                   | <i>BMJ Open</i>                                                                                                                                                                                                                                                                                                                                                   |
| Manuscript ID                                                                                                                                                                                                              | bmjopen-2017-019952                                                                                                                                                                                                                                                                                                                                               |
| Article Type:                                                                                                                                                                                                              | Research                                                                                                                                                                                                                                                                                                                                                          |
| Date Submitted by the Author:                                                                                                                                                                                              | 18-Oct-2017                                                                                                                                                                                                                                                                                                                                                       |
| Complete List of Authors:                                                                                                                                                                                                  | Feldman, Harriet; Oxford University Hospitals NHS Foundation Trust<br>DeVito, Nicholas; University of Oxford Department of Primary Care Health Sciences<br>Mendel, Jonathan; University of Dundee, Geography<br>Carroll, David; Queen's University Belfast, Centre for Experimental Medicine<br>Goldacre, Ben; University of Oxford, Primary Care Health Sciences |
| <b>Primary Subject Heading</b>:                                                                                                                                                                                            | Health policy                                                                                                                                                                                                                                                                                                                                                     |
| Secondary Subject Heading:                                                                                                                                                                                                 | Research methods                                                                                                                                                                                                                                                                                                                                                  |
| Keywords:                                                                                                                                                                                                                  | Conflict of Interest, Gifts and Hospitality, Freedom of Information Act (FoIA), Pharmaceutical Industry, NHS Trusts                                                                                                                                                                                                                                               |
| <p>Note: The following files were submitted by the author for peer review, but cannot be converted to PDF. You must view these files (e.g. movies) online.</p> <p>Appendix 2.zip<br/>Appendix 3.zip<br/>Appendix 4.zip</p> |                                                                                                                                                                                                                                                                                                                                                                   |

SCHOLARONE™  
Manuscripts

1  
2  
3 **A Cross-Sectional Study of All Clinicians' Conflict of Interest Disclosures to NHS**  
4 **Hospital Employers in England 2015-2016**

5 Harriet Ruth Feldman, Nicholas J. DeVito, Jon Mendel, David E Carroll, Ben Goldacre  
6  
7

8 Dr Harriet Ruth Feldman  
9 Academic Foundation Trainee  
10 harriet.feldman@doctors.org.uk  
11 Oxford University Hospitals NHS Foundation Trust  
12 Headley Way  
13 Oxford  
14 OX3 7DH  
15  
16

17  
18 Nicholas J DeVito  
19 Researcher  
20 nicholas.devito@phc.ox.ac.uk  
21 Centre for Evidence Based Medicine  
22 Department of Primary Care Health Sciences  
23 University of Oxford  
24 Radcliffe Observatory Quarter  
25 Woodstock Road  
26 Oxford OX2 6GG  
27  
28

29  
30 Dr Jonathan Mendel,  
31 J.M.Mendel@dundee.ac.uk  
32 Lecturer  
33 School of Social Sciences,  
34 University of Dundee,  
35 Dundee DD1 4HN  
36  
37

38 Dr David Carroll  
39 Academic Foundation Year 2 Doctor  
40 dcarroll06@qub.ac.uk  
41 Centre for Experimental Medicine  
42 Queen's University Belfast  
43 University Road  
44 Belfast  
45 BT7 1NN  
46  
47

48  
49 Dr Ben Goldacre (corresponding)  
50 Senior Clinical Research Fellow  
51 ben.goldacre@phc.ox.ac.uk  
52 Centre for Evidence Based Medicine  
53 Department of Primary Care Health Sciences  
54 University of Oxford  
55  
56  
57  
58  
59  
60

1  
2  
3 Radcliffe Observatory Quarter  
4 Woodstock Road  
5 Oxford OX2 6GG  
6  
7  
8  
9  
10  
11  
12  
13  
14  
15  
16  
17  
18  
19  
20  
21  
22  
23  
24  
25  
26  
27  
28  
29  
30  
31  
32  
33  
34  
35  
36  
37  
38  
39  
40  
41  
42  
43  
44  
45  
46  
47  
48  
49  
50  
51  
52  
53  
54  
55  
56  
57  
58  
59  
60

For peer review only

## Abstract

*Objective:* We set out to document how NHS trusts in the UK record and share disclosures of conflict of interest by their employees.

*Design:* Cross-sectional study of responses to a Freedom of Information Act request for Gifts and Hospitality Registers.

*Setting:* NHS Trusts in England.

*Participants:* 236 Trusts were contacted, of which 217 responded.

*Main Outcome Measures:* We assessed all disclosures for completeness and openness, scoring them for achieving each of five measures of transparency.

*Results:* 185 Trusts (78%) provided a register. 71 Trusts did not respond within the 28 day time limit required by the FOIA. Most COI registers were incomplete by design, and did not contain the information necessary to assess conflicts of interest. 126/185 (68%) did not record the names of recipients. 47/185 (25%) did not record the cash value of the gift or hospitality. Only 31/185 registers (16%) contained the names of recipients, the names of donors, and the cash amounts received. 18/185 (10%) contained none of: recipient name, donor name, and cash amount. Only 15 Trusts had their disclosure register publicly available online (6%). We generated a transparency index assessing whether each Trust met the following criteria: responded on time; provided a register; had a register with fields identifying donor, recipient, and cash amount; provided a register in a format that allowed further analysis; and had their register publicly available online. Mean attainment was 1.9/5; no NHS trust met all five criteria.

*Conclusion:* Overall, recording of employees' conflicts of interest by NHS trusts is poor. None of the NHS Trusts in England met all transparency criteria. 19 did not respond to our FOIA requests, 51 did not provide a Gifts and Hospitality Register and only 31 of the registers provided contained enough information to assess employees' conflicts of interest. Despite obligations on healthcare professionals to disclose conflicts of interest, and on organisations to record these, the current system for logging and tracking such disclosures is not functioning adequately. We propose a simple national template for reporting conflicts of interest, modelled on the US "Sunshine Act".

Word count: 354 words.

## What this paper adds

WHAT IS ALREADY KNOWN ON THIS SUBJECT: Pharmaceutical industry gifts, hospitality and sponsorship affect the prescribing patterns of doctors. This kind of industry contact is common amongst UK doctors: GMC and other guidance requires such conflicts of interest to be reported to employers. It is not known how well this disclosure system is functioning.

WHAT THIS STUDY ADDS: Conflict of Interest reporting in NHS Trusts is poor. Registers are often not kept, do not record salient information, are incomplete, or not publicly available. This means that conflict of interest amongst UK doctors cannot be effectively audited, and individual doctors' conflicts cannot readily be identified.

## Strengths and Limitations of this Study

- We included all NHS Trusts in England.
- Responding to Freedom of Information Act (FOIA) requests is a statutory responsibility: we therefore yielded a high (91.9%) response rate.
- Trusts who did not respond to our FOIA request may have poorer COI disclosure practices: we may therefore have underestimated the extent of the problems identified.

## Abbreviations

ABPI - Association of the British Pharmaceutical Industry

CCG - Clinical Commissioning Group

CPD - Continuing Professional Development

FOIA - Freedom of Information Act

PPSA - Physician Payments Sunshine Act

## Introduction

\$2.4 billion was given to US doctors by the pharmaceutical industry in 2015[1]. 48% of all doctors in the US received such payments, the majority of which were 'general' payments rather than payments for research. The motive for the pharmaceutical industry in spending this money is widely held to be marketing[2]. In the UK the 2015 spend has been reported by industry as £111 million, excluding payments for research[3]. Direct gifts and inducements have been prohibited since 2010 by the Association of the British Pharmaceutical Industry (ABPI), an industry membership organisation that has also become a voluntary regulator of the pharmaceutical industry[4]. However, pharmaceutical companies can still pay doctors to deliver Continuing Professional Development (CPD) lectures or sponsor their attendance at conferences. They can directly provide 'training' or 'updates' to clinicians, often accompanied by generous catering. They can also sponsor educational and academic events within hospitals, provide restaurant meals, and send marketing staff (commonly known as 'drug reps') to meet with doctors directly. A recent systematic review [5] found an association between the amount of contact doctors had with the pharmaceutical industry and a decrease in their prescribing quality, or an increase in inappropriate prescribing and prescribing cost.

Doctors and other healthcare professionals are required to declare all financial conflicts of interest so that their appropriateness, and any possible impact on professional behaviour, can be assessed independently and transparently. The US Sunshine Act requires that all payments to doctors are declared onto a single central database that is openly accessible. UK guidelines are more fragmented. The GMC [6], and some other professional organisations [7,8] require healthcare providers to declare any potential conflict of interest to both their patients and their employers. NHS England circulated 'Standards of Business Conduct' to NHS trusts in 1993 [9], which stipulates that all NHS staff 'should' declare potential conflicts of interest to their employers, and that these 'should' be recorded in a Gifts and Hospitality Register. These guidelines are not binding on NHS trusts, although many do incorporate them into local guidelines and therefore staff contracts. Industry transparency requirements are similarly problematic. In 2016 the Association of the British Pharmaceutical Industry (ABPI) released a database of all payments by UK pharmaceutical companies to healthcare professionals. However, those in receipt of these payments could opt out of having their name declared on this database, leaving the payment recorded only in aggregate for each company. This, and other problems with the database, means that it provides an "illusion of transparency" rather than an auditable resource[10].

Given the problems with industry disclosure it is hoped that declarations to NHS trusts, which employ many of the doctors in the UK, might provide transparency around industry payments to healthcare professionals. There has never been a systematic examination of the existence and contents of these registers. We therefore set out to request and describe all UK NHS Gifts and Hospitality registers.

## Methods

Our objectives were to: request all COI registers from all English NHS trusts; describe whether they were delivered; assess the contents and structure of hospitals' disclosure registers; and generate summary statistics describing disclosures overall.

### *Obtaining COI registers*

We sent all 236 NHS Trusts in the UK a Freedom of Information Act (FOIA) request asking for a copy of their Gifts and Hospitality Register for the financial year 2015/16. No Trusts were

1  
2  
3 excluded. We also requested the number of staff members who have been the subject of  
4 internal investigations or disciplinary proceedings in relation to purported conflicts of interest, or  
5 the failure to declare them, and the outcomes of these investigations or proceedings. The  
6 Freedom of Information Requests were sent out in the two weeks after 9<sup>th</sup> July 2016. Contact  
7 details were obtained from each Trust's website and placed into a spreadsheet; a Google Apps  
8 script was then used to send standardised emails to each Trust. The text of the FOIA request is  
9 shared in Appendix 1. We logged replies until mid-November 2016. Trusts which did not reply  
10 were followed up twice. Summary statistics are presented on the proportion of Trusts sending  
11 their COI register in total; and the proportion responding within the timescale stipulated by the  
12 Act (20 working days). We describe the proportion invoking section 12 to avoid disclosing (a  
13 refusal on grounds of cost), and those citing section 40 to remove names from the register (on  
14 grounds of privacy). We also logged those trusts who directed us to the ABPI's summary  
15 disclosure database on which healthcare professionals can choose to have their payments  
16 anonymised.  
17

### 18 *Assess the contents and structure of hospitals' disclosure registers.*

19 We extracted the following structured data to describe the contents of each hospital's disclosure  
20 register: the format the information was delivered in (PDF, document, spreadsheet, scans of  
21 handwritten sheets, or text within an email); and the information given about each individual  
22 disclosure (the name of the recipient, the name of the company providing the gift or hospitality,  
23 the cash amount of the gift). In addition, we noted whether the register was already publicly  
24 available online. We also checked each register for any identifying patient data. We generated  
25 summary statistics to describe these contents.  
26  
27

### 28 *Summary Statistics on Disclosures*

29 Because the data provided was in multiple formats, and frequently not structured, it could not be  
30 aggregated for analysis. We manually transcribed data from a random sample of 20 Trust's  
31 disclosures and generated summary statistics on: the number of disclosures per Trust; the size  
32 of each individual disclosure; the profession of those making disclosures; and the source of the  
33 payment (industry or patient).  
34  
35

### 36 *Data and analysis*

37 A copy of the template emails sent to Trusts is shared as Appendix 1 on Figshare. All analyses  
38 were conducted in Google Sheets.  
39

### 40 *Patient involvement*

41 No patients were involved in setting the research question or the outcome measures, nor were  
42 they involved in the design or conduct of the study. No patients were asked to advise on  
43 interpretation or writing up of results. There are no plans to disseminate the results of the  
44 research to study participants.  
45

## 46 **Results**

### 47 *Obtaining Trust Disclosure Registers*

48 Of the 236 trusts sent a Freedom of Information request, 217 responded (91.9%). 185 Trusts  
49 (78.4%) provided a copy of their Gifts and Hospitality register for the financial year 2015/16. 10  
50 Trusts (4.2%) declined to share their disclosure register and invoked Section 12 of the FOIA, an  
51 exemption available where a public body can assert that the cost of collating and sharing  
52 information would exceed £450. Other reasons given for not providing a Gifts and Hospitality  
53 register included: no register was held (18/217, 8.3%); the register contained no entries (5/217,  
54 2.3%); the register was on paper only (5/217, 2.3%); and other reasons (3/217, 1.3%). Of those  
55  
56  
57  
58  
59  
60



trusts that did not hold a register, two claimed it was not needed because their staff were contractually prohibited from accepting such payments, and six Trusts sent data from the ABPI instead. In three of these cases, a version of the ABPI database was sent with the names of the recipients redacted, even though this information is freely available online with names unredacted. 12 Trusts (5.5%) suggested that we refer to the ABPI database for further or more complete information.

#### *Contents and structure of hospitals' disclosure registers.*

Of the 185 registers received, only 31/185 (16.7%) were complete – containing fields recording the name of the recipient, the name of the donor and the cash amount received. However, even when there were fields to record these data, incomplete records were common. 126 registers (68.1%) did not have a field for the name of the recipient. 14 Trusts (7.6%) explicitly stated that they had redacted this field under Section 40 of the Freedom of Information Act, arguing that it constituted personal information. Some Trusts redacted only the names of staff under a certain pay band. 59 registers (31.9%) did not have a field for the name of the donor. 47 registers (25.4%) did not have a field for the cash value of the gift or hospitality. The overlap between these elements is shown in a Venn diagram in Figure 1. Of note, 18 registers (9.7%) contained none of: recipient name, donor name, or declaration of the cash amount received.

*Figure 1: Venn diagram showing the information contained in the registers received.*

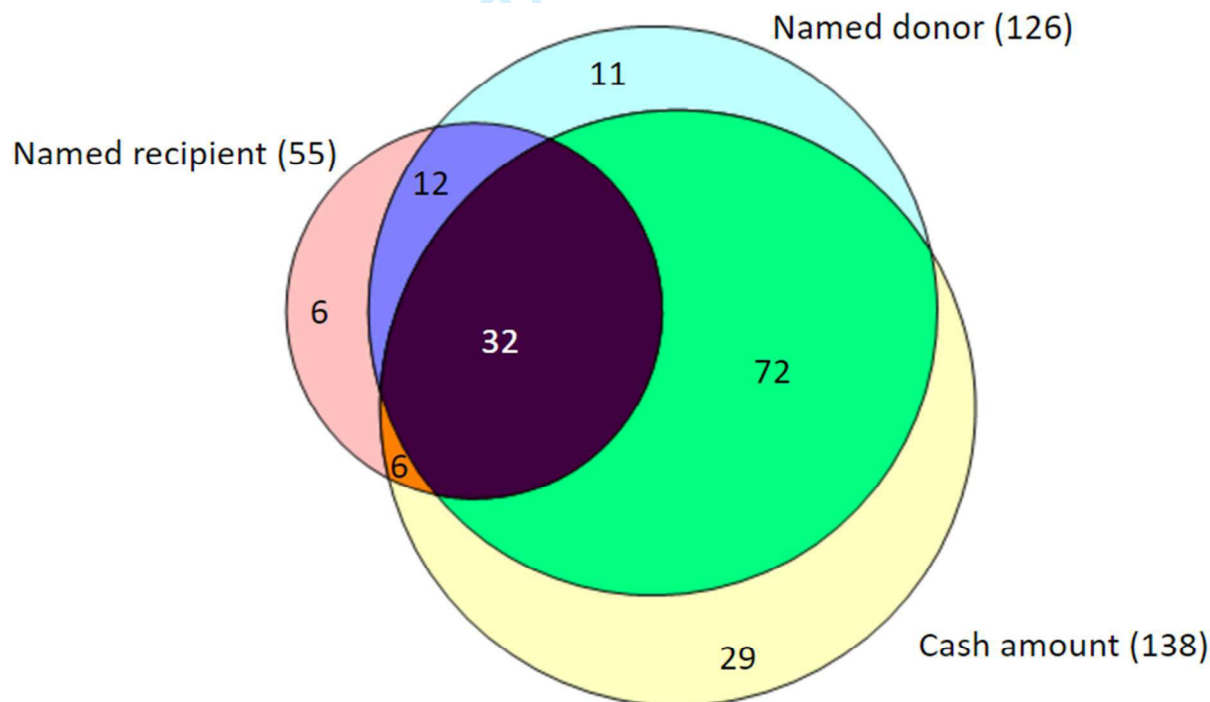

We generated a transparency index assessing whether each Trust met the following criteria: (1) responded on time; (2) provided a register; (3) had a register with fields identifying donor, recipient, and cash amount; (4) provided a register in a format that allowed further analysis; and (5) had their register publicly available online. The proportion of Trusts meeting each of these

five criteria is given in Table 1; the distribution of the total number of criteria met is given in Figure 2. Mean attainment was 1.9/5. No NHS trust met all five criteria.

**Table 1: Number and percentage of Trusts achieving each transparency criteria.**

| Transparency Element                                                                    | Number of Trusts Achieving Criteria | Proportion of Trusts Achieving Criteria |
|-----------------------------------------------------------------------------------------|-------------------------------------|-----------------------------------------|
| Responded on time                                                                       | 165                                 | 69.9%                                   |
| Provided a register                                                                     | 185                                 | 78.4%                                   |
| Contained fields for named donor, named recipient and cash amount                       | 31                                  | 13.1%                                   |
| Provided the register in a format that allowed further analysis (i.e. spreadsheet, csv) | 53                                  | 22.5%                                   |
| Made register publicly available online                                                 | 15                                  | 6.4%                                    |

*Figure 2: Distribution of total number of transparency criteria met, across all NHS Trusts.*

#### Transparency scores

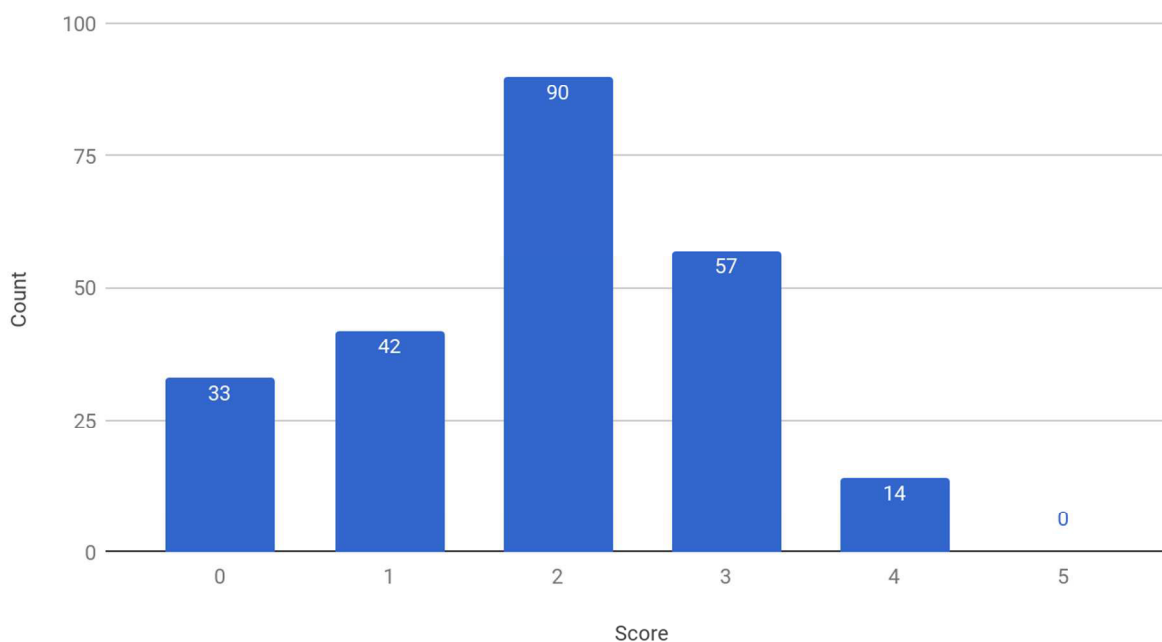

#### *Breaches of Patient Confidentiality in Trust Responses*

11/185 (5.9%) of the registers contained information which could potentially breach patient confidentiality - for example, giving the name of the patient or relative who had given a gift to a

1  
2  
3 healthcare professional. To protect patients' confidentiality we have therefore removed the  
4 disclosures made by these Trusts from our shared dataset.  
5

### 6 *Data on Disciplinary Hearings*

7 199 trusts returned information on the number of disciplinary hearings related to conflict of  
8 interest. Of these, 174 had had none. The mean number per Trust was 0.2. The definition of  
9 'conflict of interest' was interpreted broadly by Trusts and included actions such as having a  
10 second job and working while on sick leave.  
11

### 12 *Summary Statistics on Disclosures*

13 Data from 20 trusts was transcribed into spreadsheet format to produce summary statistics. The  
14 registers transcribed contained a mean of 30.8 entries (range 4-175). A total of £162,245 was  
15 declared across 428 entries, giving a mean declaration size of £379. However, there was  
16 substantial rightward skew with a median declaration of £127.50 and 122 entries with value £30  
17 or less. It was possible to ascertain the profession of the recipient in 286 of the entries. 39% of  
18 these entries were made by doctors, 25% by nurses, 11% by allied health professionals and 2%  
19 by pharmacists. The remaining 23% of declarations were made by non-clinical staff. It was  
20 possible to identify the nature of the donor in 595 of the entries. Of these, 44% were from ABPI-  
21 member pharmaceutical companies. Less than 1% (6/286) were from pharmaceutical  
22 companies not registered with the ABPI. Medical commercial entities (such as medical device  
23 companies) accounted for 19%. Other commercial entities comprised 16%, and 9% were gifts  
24 from patients. The remainder were from charity, governmental and other organisations.  
25  
26

### 27 *Trusts With a "Zero" Disclosure*

28 Five trusts stated that they had no entries on their register, and another two delivered empty  
29 registers. For those trusts which described or returned no entries, we found 230 records in the  
30 ABPI disclosure database relating to payments to individuals employed at these Trusts, totalling  
31 £119,851.35. In addition, we found 107 records of payments to these trusts directly, an average  
32 of £22,293 per trust.  
33  
34

35 Two of these trusts stated that a disclosure register was not needed as their policies prohibited  
36 staff from taking such payments. One, East London Foundation Trust, stated: "*Trust Policy*  
37 *prohibits the acceptance of payments from pharmaceutical companies to members of staff. We*  
38 *therefore have no such register.*" A search of the ABPI database (dated 19/04/2017) returned 7  
39 payments to 5 individuals who registered their institution as East London Foundation Trust, with  
40 a total value of £2050.63. Hertfordshire Community NHS Foundation Trust stated: "*We do not*  
41 *have a "gifts" register, as under the Trust's Standards of Business Conduct Policy (previously*  
42 *supplied) a gift is either acceptable (in which case it doesn't need to be reported) or it is not*  
43 *acceptable.*" A search of the ABPI database returned 5 payments to 4 individuals who  
44 registered their institution as Hertfordshire Community NHS Foundation Trust, totalling £734.43.  
45 Since clinicians are permitted to withhold disclosure of their data on the ABPI, and non-  
46 disclosure rates on the ABPI database are high, this is likely to be an incomplete list.  
47  
48

### 49 *Data Sharing*

50 All responses and all analyses are shared on FigShare. Appendix 2 shows all submissions  
51 received, other than those where we have concerns that Trusts have breached patient  
52 confidentiality in their returns. In order to illustrate the issues described in summary text above  
53 we have also shared a range of illustrative examples in Appendix 3: 3.1 shows an example of a  
54 register which mostly lists trivial gifts from patients. 3.2 shows a register which mostly discloses  
55 additional employment. 3.3 covers only board members and not staff. 3.4 shows a data  
56  
57  
58  
59  
60

1  
2  
3 structure which is almost impenetrable to analysis and audit. Appendix 4 contains all underlying  
4 data and analyses for the summary data presented.  
5

## 6 **Conclusion**

### 7 *Summary of Findings*

8 Overall, recording of the interests of employees by NHS trusts is poor. None of the NHS Trusts  
9 in England met all transparency criteria by: 1) responding on time; 2) providing a register; 3) that  
10 register having a complete data structure; 4) providing the data in a reusable (spreadsheet)  
11 format; 5) making the register publicly available online. 59/185 trusts did not record the donor of  
12 the payment or hospitality, which makes it impossible to assess the conflict of interest. 18 trusts  
13 did not hold a disclosure register at all.  
14  
15

### 16 *Strengths and limitations of the study design*

17 The use of a statutory framework - the Freedom of Information Act (FoIA) - led to a very high  
18 (91.9%) response rate in this study. The presence of missing data is in itself informative:  
19 responses that were absent or incomplete are an important finding. However, it is possible that  
20 Trusts which failed to respond to a FoIA request are also failing on other administrative issues,  
21 and that the absence of their disclosures may result in our study underestimating the problems  
22 with Trust registers, by only coding those from Trusts which did respond.  
23  
24

### 25 *Findings in context*

26 We have previously outlined the problems with the ABPI's "Disclosure UK" as a platform for  
27 reporting conflicts of interest[10], in particular that doctors can choose to redact themselves  
28 from that dataset. Barriers to accessing UK COI data mean that there is little prior work  
29 analysing such disclosures. In the US, disclosures are managed on a national level by the  
30 federal government. The Physician Payments Sunshine Act (PPSA) was passed as part of the  
31 Patient Protection and Affordable Care Act in 2010[11]. The PPSA required industry to report all  
32 payments to physicians and teaching hospitals in excess of \$10 to the Centers for Medicare and  
33 Medicaid Services (CMS). This includes payments for "general" categories such as educational  
34 materials or food and beverage, as well as funding for research and ownership stakes in the  
35 reporting entities. CMS then makes this data available through the publicly searchable Open  
36 Payments website. The Open Payments website[12] currently houses all reported payments  
37 from August 1, 2013 to 31st December 2016. Over this time, the Open Payments database has  
38 grown to include details of nearly \$25 billion worth of payments to physicians and teaching  
39 hospitals including \$7,001,435,854 in general payments to 905,238 individual physicians. For  
40 the full 3.5 years covered by the PPSA, the mean number of payments to physicians is 43 and  
41 the mean amount received is \$7,734.36[13].  
42  
43

44 While unpopular with physicians[14], the comprehensive and accessible nature of the data has  
45 allowed researchers to assess and quantify the impact of pharmaceutical payments. For  
46 example, there is a dose-response relationship between receiving more pharmaceutical  
47 payment and increased prescribing cost[15] and branded drug prescribing[16], which has been  
48 demonstrated by linking publicly available Medicare prescribing data with Open Payments data.  
49 Others have used the data to characterize industry payments within their specialty[17,18] or  
50 auditing targeted groups such as guideline authors[19,20]. While the program is still new, there  
51 is evidence that industry spending may be decreasing since the launch of Open  
52 Payments[21,22]. Some researchers are even beginning to use PPSA data to examine  
53 association between relationships with industry and clinical practice[23].  
54  
55

### 56 *Interpretation and Policy Implications*

1  
2  
3 The current system of piecemeal private declarations to NHS employers, and optional  
4 declarations through the ABPI's "Disclosure UK", is not delivering transparency on COI in the  
5 UK. Through our analysis of these records, we identify four main barriers to transparency.  
6

7 Firstly, there is no central system for disclosures to employers. This allows wide variations in the  
8 standards of reporting and recording COI. Many healthcare professionals will also have more  
9 than one public sector employer simultaneously, or sequentially over a short time period.  
10 Declaring separately with each employer makes it unlikely that any one organisation will have  
11 access to full information about their employees. Secondly, there is poor auditing of records,  
12 and a lack of evidence that contents are reflected on locally. Most Trusts allowed incomplete  
13 records to be returned, seemed not to compare their declarations with other sources such as  
14 the ABPI database, and appeared happy to accept implausibly empty registers. If this  
15 information is collected but not examined or acted upon, there is a risk that this gives an  
16 unwarranted appearance of transparency and rigorous management. Thirdly, the variation in  
17 types of information disclosed and how it was presented suggests that there is lack of clarity  
18 about what constitutes a COI; and a lack of consensus around how to handle diverse categories  
19 of COI such as income from private work, interactions with industry, and gifts from patients.  
20 Lastly, COI records are generally not made public. Most Trusts did not place their registers on  
21 the internet, and most did not give the names of recipients on their COI register.  
22  
23

24 Some NHS Trusts cited the Freedom of Information Act as a reason to withhold the identity of  
25 recipients, specifically Section 40 of the Act, which aims to protect individuals' personal privacy.  
26 In our view there are good grounds to argue that this is not a legitimate use of Section 40:  
27 employees were largely acting in a professional capacity when they received payments;  
28 disclosure represents a legitimate public interest; FOIA emphasises the importance of  
29 "transparency and accountability" when considering personal data disclosure; healthcare  
30 professionals have existing disclosure obligations to professional regulators (for example, the  
31 GMC requires doctors to inform their patients about any conflicts of interest); and staff  
32 expectations at the time of disclosure to a Trust are therefore likely to have been that this COI  
33 information should or could be made public. These issues can be resolved through an extensive  
34 process of appeals to the Information Commissioner, although this process may take years  
35 rather than months.  
36  
37

38 On 9th February 2017, NHS England published new guidance about managing conflict of  
39 interest within the NHS[24]. This guidance aims to offer more complete and consistent principles  
40 for managing COI in NHS Trusts, CCGs and NHS England. The guidance emphasises that  
41 declarations must be collected and recorded, and recommends that it is published (with names  
42 of staff) on an organisation's website. However, this guidance is not binding on Trusts, and each  
43 organisation is free to adopt whatever standards it wishes. There is no proposal that the data  
44 should be centralised. The template disclosures ask for a 'description' of the interest in a single  
45 text field meaning that information can be omitted, or shared as unstructured free text, meaning  
46 that work done in the US on structured open data would continue to be impossible for UK  
47 disclosures. There is no guidance on identifying and managing the impact of pharmaceutical  
48 gifts and hospitality on prescribing. The new NHS COI policy would therefore not resolve the  
49 lack of transparency identified by our study.  
50

51 We propose that the UK should ideally follow the lead set by the US, requiring simple annual  
52 disclosure of all financial COI to a central openly accessible database of COI, recording cash  
53 value, type of COI, donor, and recipient. Short of this, the GMC could remind doctors and Trusts  
54 that they expect the GMC requirement for open disclosure of COIs to patients to be upheld, and  
55 clarify that complete and openly shared NHS Trust COI registers allow doctors to meet their  
56  
57  
58  
59

1  
2  
3 GMC requirements. This could be done with no changes to either legislation or the GMC  
4 document “Good Medical Practice”. Lastly, since COI is an issue for all those working in  
5 healthcare, not only doctors, we propose that it would be desirable to create and encourage the  
6 use of an openly accessible voluntary register where any healthcare professional, manager, or  
7 researcher in the UK could openly log their conflicts of interest in a structured, searchable  
8 format. We are now seeking funds to deliver and maintain this service.  
9

### 10 *Future directions*

11 We aim to repeat this study to assess the impact of the new NHS guidance on disclosure, while  
12 acknowledging that such change is unlikely for the reasons given above. We also aim to expand  
13 our study to include Primary Care, where 55% of UK prescribing costs occur[25], by assessing  
14 the recording of COI by Clinical Commissioning Groups (CCGs). This has received attention  
15 recently after an audit in April 2016 showed that COI were inconsistently recorded within CCGs,  
16 and new binding guidance was released in July 2016[26].  
17  
18

### 19 *Conclusions*

20 Information on COI is poorly collected, poorly managed, and poorly disclosed by NHS Trusts in  
21 England. The ongoing absence of transparency around COI in the UK may undermine public  
22 trust in the healthcare professions. Simple clear legislation and a requirement for open  
23 disclosure of COI to a central body, similar to that in the US, would present a simple and  
24 effective solution.  
25  
26

### 27 **Acknowledgements and Contributions**

28 BG conceived the study with JM and DEC, who undertook a pilot audit in 2012. BG and HRF  
29 designed the study. HRF collected and analysed the data with input from ND and BG. HRF  
30 drafted the manuscript. All authors contributed to and approved the final manuscript. BG and  
31 HRF conceived the associated website resource which was built by Seb Bacon. BG supervised  
32 the project. BG and HRF are guarantors.  
33  
34  
35

### 36 **Competing Interests Statement:**

37 All authors have completed the ICMJE uniform disclosure form at  
38 [www.icmje.org/coi\\_disclosure.pdf](http://www.icmje.org/coi_disclosure.pdf) and declare the following: JM reports grants from Oak  
39 Foundation, NordForsk, ESRC and Netherlands Organisation for Scientific Research, and  
40 grants and other from Scottish Institute for Policing Research. JM has received a very small  
41 additional income (under £150 in total) for writing about problems around evidence and policy.  
42 These are all outside the submitted work. BG has received research funding from the Laura and  
43 John Arnold Foundation, the Wellcome Trust, the NHS National Institute for Health Research,  
44 the Health Foundation, and the World Health Organisation; he also receives personal income  
45 from speaking and writing for lay audiences on the misuse of science. ND is employed on BG's  
46 grant from LJAF. HRF has received research funding from the Wellcome Trust, Green  
47 Templeton College, Guarantors of Brain and Oxford University Clinical Academic graduate  
48 school. DEC has received research funding from the Jean Shanks Foundation and the  
49 Wellcome Trust. He has received software development funding from the Open Society  
50 Foundations, Jisc and the Public Library of Science (PLOS). He has received travel funding  
51 from PLOS and the Scholarly Publishing and Academic Resources Coalition.  
52  
53  
54  
55  
56  
57  
58  
59

**Transparency Declaration:**

The lead author affirms that the manuscript is an honest, accurate, and transparent account of the study being reported; that no important aspects of the study have been omitted; and that any discrepancies from the study as planned have been explained. We confirm that this report is compliant with the STROBE guidelines for reporting observational research.

**Licensing:**

The Corresponding Author has the right to grant on behalf of all authors and does grant on behalf of all authors, a worldwide licence (<http://www.bmj.com/sites/default/files/BMJ%20Author%20Licence%20March%202013.doc>) to the Publishers and its licensees in perpetuity, in all forms, formats and media (whether known now or created in the future), to i) publish, reproduce, distribute, display and store the Contribution, ii) translate the Contribution into other languages, create adaptations, reprints, include within collections and create summaries, extracts and/or, abstracts of the Contribution and convert or allow conversion into any format including without limitation audio, iii) create any other derivative work(s) based in whole or part on the on the Contribution, iv) to exploit all subsidiary rights to exploit all subsidiary rights that currently exist or as may exist in the future in the Contribution, v) the inclusion of electronic links from the Contribution to third party material where-ever it may be located; and, vi) licence any third party to do any or all of the above. All research articles will be made available on an Open Access basis (with authors being asked to pay an open access fee—see <http://www.bmj.com/about-bmj/resources-authors/forms-policies-and-checklists/copyright-open-access-and-permission-reuse>). The terms of such Open Access shall be governed by a Creative Commons licence—details as to which Creative Commons licence will apply to the research article are set out in our worldwide licence referred to above.

**Funding:**

BG is funded by the Laura and John Arnold Foundation to conduct work on research integrity, but not specifically this project. No funder had any involvement in the study design or the decision to submit.

**Ethical Approval:**

None required.

**Data Sharing:**

All underlying data and analysis is shared alongside this manuscript on FigShare.

**Supplementary Materials**

All supplementary materials can be found on Figshare.

**References**

- 1 Tringale KR, Marshall D, Mackey TK, *et al*. Types and Distribution of Payments From Industry to Physicians in 2015. *JAMA* 2017;**317**:1774–84.

- 1  
2  
3 2 Kremer STM, Bijmolt THA, Leeflang PSH, *et al.* Generalizations on the effectiveness of  
4 pharmaceutical promotional expenditures. *International Journal of Research in Marketing*  
5 2008;**25**:234–46.
- 6  
7 3 Hawkes N. Doctors getting biggest payments from drug companies don't declare them on new  
8 website. *BMJ* 2016;**354**:i3679.
- 9  
10 4 code\_of\_practice\_2016.pdf. [http://www.abpi.org.uk/our-](http://www.abpi.org.uk/our-work/library/guidelines/Documents/code_of_practice_2016.pdf)  
11 [work/library/guidelines/Documents/code\\_of\\_practice\\_2016.pdf](http://www.abpi.org.uk/our-work/library/guidelines/Documents/code_of_practice_2016.pdf)
- 12  
13 5 Brax H, Fadlallah R, Al-Khaled L, *et al.* Association between physicians' interaction with  
14 pharmaceutical companies and their clinical practices: A systematic review and meta-analysis. *PLoS*  
15 *One* 2017;**12**:e0175493.
- 16  
17 6 Good medical practice. [http://www.gmc-uk.org/static/documents/content/GMP\\_.pdf](http://www.gmc-uk.org/static/documents/content/GMP_.pdf)
- 18  
19 7 The Code for nurses and midwives. [https://www.nmc.org.uk/globalassets/sitedocuments/nmc-](https://www.nmc.org.uk/globalassets/sitedocuments/nmc-publications/nmc-code.pdf)  
20 [publications/nmc-code.pdf](https://www.nmc.org.uk/globalassets/sitedocuments/nmc-publications/nmc-code.pdf)
- 21  
22 8 standards\_for\_pharmacy\_professionals\_may\_2017\_0.pdf.  
23 [https://www.pharmacyregulation.org/sites/default/files/standards\\_for\\_pharmacy\\_professionals\\_may\\_](https://www.pharmacyregulation.org/sites/default/files/standards_for_pharmacy_professionals_may_2017_0.pdf)  
24 [2017\\_0.pdf](https://www.pharmacyregulation.org/sites/default/files/standards_for_pharmacy_professionals_may_2017_0.pdf)
- 25  
26 9 Executive M. for NHS staff.  
27 [http://webarchive.nationalarchives.gov.uk/20130107105354/http://www.dh.gov.uk/prod\\_consum\\_dh/g-](http://webarchive.nationalarchives.gov.uk/20130107105354/http://www.dh.gov.uk/prod_consum_dh/groups/dh_digitalassets/@dh/@en/documents/digitalasset/dh_4065045.pdf)  
28 [roups/dh\\_digitalassets/@dh/@en/documents/digitalasset/dh\\_4065045.pdf](http://webarchive.nationalarchives.gov.uk/20130107105354/http://www.dh.gov.uk/prod_consum_dh/groups/dh_digitalassets/@dh/@en/documents/digitalasset/dh_4065045.pdf)
- 29  
30 10 Kmietowicz Z. Disclosure UK website gives 'illusion of transparency,' says Goldacre. *BMJ*  
31 2016;**354**:i3760.
- 32  
33 11 Agrawal S, Brown D. The Physician Payments Sunshine Act--Two Years of the Open Payments  
34 Program. *N Engl J Med* 2016;**374**:906–9.
- 35  
36 12 index. Published Online First: 8 August 2016. <https://www.cms.gov/openpayments/> (accessed 14 Jun  
37 2017).
- 38  
39 13 Devito N. OpenPayments\_General Payment Data Through 2016.zip. *figshare* Published Online First:  
40 2017. doi:10.6084/m9.figshare.5230489.v1
- 41  
42 14 Chimonas S, DeVito NJ, Rothman DJ. Bringing Transparency to Medicine: Exploring Physicians'  
43 Views and Experiences of the Sunshine Act. *Am J Bioeth* 2017;**17**:4–18.
- 44  
45 15 Perlis RH, Perlis CS. Physician Payments from Industry Are Associated with Greater Medicare Part  
46 D Prescribing Costs. *PLoS One* 2016;**11**:e0155474.
- 47  
48 16 Qian J, Hansen RA, Surry D, *et al.* Disclosure of industry payments to prescribers: industry payments  
49 might be a factor impacting generic drug prescribing. *Pharmacoepidemiol Drug Saf* Published Online  
50 First: 9 May 2017. doi:10.1002/pds.4224
- 51  
52 17 Factors associated with financial relationships between Spine Surgeons and Industry: An Analysis of  
53 the Open Payments Database. *Spine* Published Online First: 1 February 2017.  
54 doi:10.1097/BRS.0000000000002121
- 55  
56 18 Chang JS. The Physician Payments Sunshine Act: data evaluation regarding payments to  
57 ophthalmologists. *Ophthalmology* 2015;**122**:656–61.
- 58  
59 19 Ramzi Dudum GWU, Omar Harfouch GWU, Heather A. Young GWU, *et al.* ACC/AHA Guideline  
60 Authors Self-Disclosed Relationships Compared to the Open Payments Database: Do Discrepancies



- 1  
2  
3 Represent Undisclosed Conflicts of Interest? In: *GW Research Days 2016 - Present*. 2016.  
4 [http://hsrc.himmelfarb.gwu.edu/gw\\_research\\_days/2016/SMHS/60](http://hsrc.himmelfarb.gwu.edu/gw_research_days/2016/SMHS/60) (accessed 15 Jun 2017).  
5
- 6 20 Mitchell AP, Basch EM, Dusetzina SB. Financial Relationships With Industry Among National  
7 Comprehensive Cancer Network Guideline Authors. *JAMA Oncol* 2016;**2**:1628–31.
- 8  
9 21 Brockbank B, Amendola MF. IP175. Is There a Difference in Device- and Medication-Related  
10 Payments Made to Vascular Surgeons and Interventional Radiologists? Insights from the Open  
11 Payments Database. *J Vasc Surg* 2017;**65**:102S.
- 12  
13 22 Gangopadhyay N, Chao AH. Abstract: The Impact of the Sunshine Act Open Payments Database on  
14 Industry Financial Relationships in Plastic Surgery. *Plastic and Reconstructive Surgery Global Open*  
15 2016;**4**. doi:10.1097/01.GOX.0000502909.01781.d0
- 16  
17 23 Cook RW, Weiner JA, Schallmo MS, *et al*. The Effects of Conflicts of Interest on Practice Patterns  
18 and Complication Rates in Spine Surgery. *Spine* Published Online First: 11 May 2017.  
19 doi:10.1097/BRS.0000000000002227
- 20  
21 24 NHS England PowerPoint template. [https://www.england.nhs.uk/wp-](https://www.england.nhs.uk/wp-content/uploads/2017/02/guidance-managing-conflicts-of-interest-nhs.pdf)  
22 [content/uploads/2017/02/guidance-managing-conflicts-of-interest-nhs.pdf](https://www.england.nhs.uk/wp-content/uploads/2017/02/guidance-managing-conflicts-of-interest-nhs.pdf)
- 23  
24 25 2015/ E. Prescribing Costs in Hospitals and the Community.  
25 <http://www.content.digital.nhs.uk/catalogue/PUB22302/hosp-pres-eng-201516-report.pdf>
- 26  
27 26 revsd-coi-guidance-june16.pdf. [https://www.england.nhs.uk/commissioning/wp-](https://www.england.nhs.uk/commissioning/wp-content/uploads/sites/12/2016/06/revsd-coi-guidance-june16.pdf)  
28 [content/uploads/sites/12/2016/06/revsd-coi-guidance-june16.pdf](https://www.england.nhs.uk/commissioning/wp-content/uploads/sites/12/2016/06/revsd-coi-guidance-june16.pdf)  
29  
30  
31  
32  
33  
34  
35  
36  
37  
38  
39  
40  
41  
42  
43  
44  
45  
46  
47  
48  
49  
50  
51  
52  
53  
54  
55  
56  
57  
58  
59  
60

1  
2  
3 **Initial email:**  
4

5 Dear [trust name]  
6

7  
8 This is a request under the Freedom of Information Act 2000.  
9

10 NHS trusts are reportedly meant to keep a register of payments from pharmaceutical companies  
11 (and other relevant companies) to staff, in case of conflicts of interest [1]. I am requesting a  
12 copy of the register for this Trust - which I would hope includes details of all relevant payments  
13 to staff and any related potential conflicts of interest. If it would be possible to have this  
14 information in an appropriate structured data format - for example, a CSV file - this would be  
15 helpful. If this Trust does not have a complete register, I would request: the release of the  
16 information on this topic that the Trust does hold; and an explanation of why the Trust does not  
17 hold a complete register.  
18  
19

20  
21 I am also requesting the number of staff members who have been the subject of internal  
22 investigations or disciplinary proceedings in relation to purported conflicts of interest, or the  
23 failure to declare them, and the outcomes of these investigations or proceedings.  
24  
25

26 I am aware that some would view data on pharmaceutical funding as personal data for those  
27 staff receiving the funding. Even if some of the information on this register may be classed as  
28 personal data (although this is contestable - for example, in some sectors of academia  
29 information re funding sources is made public as a matter of course) it would be covered by  
30 paragraph 6 of Schedule 2 of the Data Protection Act. The release of these data is "necessary  
31 for the purposes of legitimate interests pursued by the data controller or by the third party or  
32 parties to whom the data are disclosed" [2]. Spurling et al's systematic review of how  
33 information from pharmaceutical companies impacts physicians' prescribing reported that, of the  
34 studies included which looked at total promotional investment, three "found that total  
35 promotional investment was positively associated with prescribing frequency...Two...found both  
36 positive results and no association...One study did not detect an association" [3]. There is thus a  
37 legitimate interest in releasing this register: the available research suggests that it is plausible  
38 that payments received influence how public money is spent and the type of care provided to  
39 members of the public.  
40  
41  
42  
43

44 For the reasons given above, there is a strong public interest in releasing this information. While  
45 "requests for the personal data of a third party are exempt under section 40(2) of the Freedom  
46 of Information Act...if disclosure would contravene section 10 of the Data Protection Act, the  
47 right to prevent processing likely to cause damage or distress" [2], I would argue that, even if  
48 some of those named in these documents feel that their release would cause them damage or  
49 distress, this is outweighed by the significant public interest served by releasing these data.  
50  
51

52  
53 Yours sincerely,  
54

55 Dr Harriet Brown  
56  
57  
58  
59  
60

1  
2  
3  
4  
5  
6 [1] <http://www.guardian.co.uk/society/2013/a...>

7 [2] <http://www.justice.gov.uk/downloads/info...>

8 [3] <http://www.plosmedicine.org/article/info...>  
9  
10  
11

12  
13 **Clarification:**  
14

15 To clarify, I am requesting a copy of the Trust's Gifts and Hospitality Register for the financial  
16 year 2015/16.  
17

18  
19 I am also requesting the number of staff members who have been the subject of internal  
20 investigations or disciplinary proceedings in relation to purported conflicts of interest, or the  
21 failure to declare them, and the outcomes of these investigations or proceedings, also for the  
22 financial year 2015/16.  
23

24  
25 Many thanks,  
26

27 Harriet Brown  
28  
29

30 **Reminder (sent twice):**  
31

32 [>20] working days have now elapsed since my request and I am still awaiting a response.  
33 Please could this be sent ASAP.  
34  
35

36 To clarify, I am requesting a copy of the Trust's Gifts and Hospitality Register for the financial  
37 year 2015/16.  
38

39  
40 I am also requesting the number of staff members who have been the subject of internal  
41 investigations or disciplinary proceedings in relation to purported conflicts of interest, or the  
42 failure to declare them, and the outcomes of these investigations or proceedings, also for the  
43 financial year 2015/16.  
44

45  
46 Many thanks,  
47

48 Harriet Brown  
49  
50  
51  
52  
53  
54  
55  
56  
57  
58  
59  
60

## STROBE Statement—checklist of items that should be included in reports of observational studies

|                           | Item No. | Recommendation                                                                                      | Page No.  | Relevant text from manuscript                                                                                                                                                                                                                                                                                                                                                                               |
|---------------------------|----------|-----------------------------------------------------------------------------------------------------|-----------|-------------------------------------------------------------------------------------------------------------------------------------------------------------------------------------------------------------------------------------------------------------------------------------------------------------------------------------------------------------------------------------------------------------|
| <b>Title and abstract</b> | 1        | (a) Indicate the study's design with a commonly used term in the title or the abstract              | 1         | 'cross-sectional'                                                                                                                                                                                                                                                                                                                                                                                           |
|                           |          | (b) Provide in the abstract an informative and balanced summary of what was done and what was found | 1         | See 354 word abstract on p1                                                                                                                                                                                                                                                                                                                                                                                 |
| <b>Introduction</b>       |          |                                                                                                     |           |                                                                                                                                                                                                                                                                                                                                                                                                             |
| Background/rationale      | 2        | Explain the scientific background and rationale for the investigation being reported                | 2         | WHAT IS ALREADY KNOWN ON THIS SUBJECT: Pharmaceutical industry gifts, hospitality and sponsorship affect the prescribing patterns of doctors. This kind of industry contact is common amongst UK doctors: GMC and other guidance requires such conflicts of interest to be reported to employers. It is not known how well this disclosure system is functioning.<br><br>See also fuller introduction on p3 |
| Objectives                | 3        | State specific objectives, including any prespecified hypotheses                                    | 1         | Objective: We set out to document how NHS trusts in the UK record and share disclosures of conflict of interest by their employees.                                                                                                                                                                                                                                                                         |
| <b>Methods</b>            |          |                                                                                                     |           |                                                                                                                                                                                                                                                                                                                                                                                                             |
| Study design              | 4        | Present key elements of study design early in the paper                                             | 1 and 3-4 | Key info in abstract; more                                                                                                                                                                                                                                                                                                                                                                                  |

|                           |    |                                                                                                                                                                                            |                 |  |                                                                                                                                                                                                                                             |
|---------------------------|----|--------------------------------------------------------------------------------------------------------------------------------------------------------------------------------------------|-----------------|--|---------------------------------------------------------------------------------------------------------------------------------------------------------------------------------------------------------------------------------------------|
|                           |    |                                                                                                                                                                                            |                 |  | detailed methodology section begins on p3                                                                                                                                                                                                   |
| Setting                   | 5  | Describe the setting, locations, and relevant dates, including periods of recruitment, exposure, follow-up, and data collection                                                            | 1               |  | Setting: NHS Trusts in England. Data collection briefly described in abstract, and in more detail pp3-4.                                                                                                                                    |
| Participants              | 6  | (a) <i>Cohort study</i> —Give the eligibility criteria, and the sources and methods of selection of participants. Describe methods of follow-up                                            | 1               |  | Study focussed on NHS Trusts in England.                                                                                                                                                                                                    |
|                           |    | <i>Case-control study</i> —Give the eligibility criteria, and the sources and methods of case ascertainment and control selection. Give the rationale for the choice of cases and controls |                 |  |                                                                                                                                                                                                                                             |
|                           |    | <i>Cross-sectional study</i> —Give the eligibility criteria, and the sources and methods of selection of participants                                                                      |                 |  |                                                                                                                                                                                                                                             |
|                           |    | (b) <i>Cohort study</i> —For matched studies, give matching criteria and number of exposed and unexposed                                                                                   |                 |  |                                                                                                                                                                                                                                             |
|                           |    | <i>Case-control study</i> —For matched studies, give matching criteria and the number of controls per case                                                                                 |                 |  |                                                                                                                                                                                                                                             |
| Variables                 | 7  | Clearly define all outcomes, exposures, predictors, potential confounders, and effect modifiers. Give diagnostic criteria, if applicable                                                   | 6 (see also p1) |  | “Responded on time; Provided a register; Contained fields for named donor, named recipient and cash amount; Provided the register in a format that allowed further analysis (i.e. spreadsheet, csv);Made register publicly available online |
| Data sources/ measurement | 8* | For each variable of interest, give sources of data and details of methods of assessment (measurement). Describe comparability of assessment methods if there is more than one group       | 1               |  | “responses to a Freedom of Information Act request for Gifts and Hospitality Registers [to] NHS Trusts in England...236 Trusts were contacted, of which 217 responded.                                                                      |

1  
2  
3  
4  
5  
6  
7  
8  
9  
10  
11  
12  
13  
14  
15  
16  
17  
18  
19  
20  
21  
22  
23  
24  
25  
26  
27  
28  
29  
30  
31  
32  
33  
34  
35  
36  
37  
38  
39  
40  
41  
42  
43  
44  
45  
46  
47

---

|            |    |                                                           |         |                                                                                                                                                                                       |
|------------|----|-----------------------------------------------------------|---------|---------------------------------------------------------------------------------------------------------------------------------------------------------------------------------------|
| Bias       | 9  | Describe any efforts to address potential sources of bias | 1 and 4 | The 236 NHS trusts in England were all contacted, removing some sources of sampling bias. Those who did not respond were contacted twice, to reduce another potential source of bias. |
| Study size | 10 | Explain how the study size was arrived at                 | 1       | Contacted all 236 NHS trusts in England.                                                                                                                                              |

---

Continued on next page

For peer review only

|                        |     |                                                                                                                                                                                                                                                                                                           |           |                                                                        |
|------------------------|-----|-----------------------------------------------------------------------------------------------------------------------------------------------------------------------------------------------------------------------------------------------------------------------------------------------------------|-----------|------------------------------------------------------------------------|
| Quantitative variables | 11  | Explain how quantitative variables were handled in the analyses. If applicable, describe which groupings were chosen and why                                                                                                                                                                              | 1 and 4-7 | Quantitative variables were used to give transparency scores (see p6)  |
| Statistical methods    | 12  | (a) Describe all statistical methods, including those used to control for confounding                                                                                                                                                                                                                     | 4-7       | Trusts were judged against criteria for transparency                   |
|                        |     | (b) Describe any methods used to examine subgroups and interactions                                                                                                                                                                                                                                       | 7         | Trusts with a 'zero' disclosure were compared against ABPI data        |
|                        |     | (c) Explain how missing data were addressed                                                                                                                                                                                                                                                               | 4-5       | Non-responses are noted, and seen as significant in themselves         |
|                        |     | (d) <i>Cohort study</i> —If applicable, explain how loss to follow-up was addressed<br><i>Case-control study</i> —If applicable, explain how matching of cases and controls was addressed<br><i>Cross-sectional study</i> —If applicable, describe analytical methods taking account of sampling strategy |           | N/A                                                                    |
|                        |     | (e) Describe any sensitivity analyses                                                                                                                                                                                                                                                                     |           | N/A                                                                    |
| <b>Results</b>         |     |                                                                                                                                                                                                                                                                                                           |           |                                                                        |
| Participants           | 13* | (a) Report numbers of individuals at each stage of study—eg numbers potentially eligible, examined for eligibility, confirmed eligible, included in the study, completing follow-up, and analysed                                                                                                         | 4-5       | Of the 236 trusts sent a Freedom of Information request, 217 responded |
|                        |     | (b) Give reasons for non-participation at each stage                                                                                                                                                                                                                                                      | 4-5       |                                                                        |
|                        |     | (c) Consider use of a flow diagram                                                                                                                                                                                                                                                                        |           | Not helpful here                                                       |
| Descriptive data       | 14* | (a) Give characteristics of study participants (eg demographic, clinical, social) and information on exposures and potential confounders                                                                                                                                                                  |           | N/A                                                                    |
|                        |     | (b) Indicate number of participants with missing data for each variable of interest                                                                                                                                                                                                                       | 4-7       |                                                                        |
|                        |     | (c) <i>Cohort study</i> —Summarise follow-up time (eg, average and total amount)                                                                                                                                                                                                                          |           | N/A                                                                    |
| Outcome data           | 15* | <i>Cohort study</i> —Report numbers of outcome events or summary measures over time                                                                                                                                                                                                                       |           | N/A                                                                    |
|                        |     | <i>Case-control study</i> —Report numbers in each exposure category, or summary measures of exposure                                                                                                                                                                                                      |           |                                                                        |
|                        |     | <i>Cross-sectional study</i> —Report numbers of outcome events or summary measures                                                                                                                                                                                                                        | 4-7       |                                                                        |
| Main results           | 16  | (a) Give unadjusted estimates and, if applicable, confounder-adjusted estimates and their precision (eg, 95% confidence interval). Make clear which confounders were adjusted for and why they were included                                                                                              |           | N/A                                                                    |
|                        |     | (b) Report category boundaries when continuous variables were categorized                                                                                                                                                                                                                                 |           | N/A                                                                    |
|                        |     | (c) If relevant, consider translating estimates of relative risk into absolute risk for a meaningful time period                                                                                                                                                                                          |           | N/A (relative risk not used here)                                      |

1  
2  
3  
4  
5  
6  
7  
8  
9  
10  
11  
12  
13  
14  
15  
16  
17  
18  
19  
20  
21  
22  
23  
24  
25  
26  
27  
28  
29  
30  
31  
32  
33  
34  
35  
36  
37  
38  
39  
40  
41  
42  
43  
44  
45  
46  
47

Continued on next page

For peer review only



1  
2  
3  
4  
5  
6  
7  
8  
9  
10  
11  
12  
13  
14  
15  
16  
17  
18  
19  
20  
21  
22  
23  
24  
25  
26  
27  
28  
29  
30  
31  
32  
33  
34  
35  
36  
37  
38  
39  
40  
41  
42  
43  
44  
45  
46  
47

---

|                   |    |                                                                                                |     |                                                                                                                                                                                                                                                                                                                                                                                                                                                                                                                                                                                                                                                                                                                                                                                                                                                                                                                                                                                         |
|-------------------|----|------------------------------------------------------------------------------------------------|-----|-----------------------------------------------------------------------------------------------------------------------------------------------------------------------------------------------------------------------------------------------------------------------------------------------------------------------------------------------------------------------------------------------------------------------------------------------------------------------------------------------------------------------------------------------------------------------------------------------------------------------------------------------------------------------------------------------------------------------------------------------------------------------------------------------------------------------------------------------------------------------------------------------------------------------------------------------------------------------------------------|
| Other analyses    | 17 | Report other analyses done—eg analyses of subgroups and interactions, and sensitivity analyses | 4-7 |                                                                                                                                                                                                                                                                                                                                                                                                                                                                                                                                                                                                                                                                                                                                                                                                                                                                                                                                                                                         |
| <b>Discussion</b> |    |                                                                                                |     |                                                                                                                                                                                                                                                                                                                                                                                                                                                                                                                                                                                                                                                                                                                                                                                                                                                                                                                                                                                         |
| Key results       | 18 | Summarise key results with reference to study objectives                                       | 1   | <p>“185 Trusts (78%) provided a register. 71 Trusts did not respond within the 28 day time limit required by the FoIA. Most COI registers were incomplete by design, and did not contain the information necessary to assess conflicts of interest. 126/185 (68%) did not record the names of recipients. 47/185 (25%) did not record the cash value of the gift or hospitality. Only 31/185 registers (16%) contained the names of recipients, the names of donors, and the cash amounts received. 18/185 (10%) contained none of: recipient name, donor name, and cash amount. Only 15 Trusts had their disclosure register publicly available online (6%). We generated a transparency index assessing whether each Trust met the following criteria: responded on time; provided a register; had a register with fields identifying donor, recipient, and cash amount; provided a register in a format that allowed further analysis; and had their register publicly available</p> |

---

For peer review only

|                          |    |                                                                                                                                                                            |     |                                                                                                                                                                                                                                                                                                  |
|--------------------------|----|----------------------------------------------------------------------------------------------------------------------------------------------------------------------------|-----|--------------------------------------------------------------------------------------------------------------------------------------------------------------------------------------------------------------------------------------------------------------------------------------------------|
|                          |    |                                                                                                                                                                            |     | online. Mean attainment was 1.9/5; no NHS trust met all five criteria.”                                                                                                                                                                                                                          |
| Limitations              | 19 | Discuss limitations of the study, taking into account sources of potential bias or imprecision. Discuss both direction and magnitude of any potential bias                 | 8   | “it is possible that Trusts which failed to respond to a FoIA request are also failing on other administrative issues, and that the absence of their disclosures may result in our study underestimating the problems with Trust registers, by only coding those from Trusts which did respond.” |
| Interpretation           | 20 | Give a cautious overall interpretation of results considering objectives, limitations, multiplicity of analyses, results from similar studies, and other relevant evidence | 8-9 |                                                                                                                                                                                                                                                                                                  |
| Generalisability         | 21 | Discuss the generalisability (external validity) of the study results                                                                                                      | 8-9 |                                                                                                                                                                                                                                                                                                  |
| <b>Other information</b> |    |                                                                                                                                                                            |     |                                                                                                                                                                                                                                                                                                  |
| Funding                  | 22 | Give the source of funding and the role of the funders for the present study and, if applicable, for the original study on which the present article is based              | 11  | “BG is funded by the Laura and John Arnold Foundation to conduct work on research integrity, but not specifically this project. No funder had any involvement in the study design or the decision to submit.”                                                                                    |

\*Give information separately for cases and controls in case-control studies and, if applicable, for exposed and unexposed groups in cohort and cross-sectional studies.

**Note:** An Explanation and Elaboration article discusses each checklist item and gives methodological background and published examples of transparent reporting. The STROBE checklist is best used in conjunction with this article (freely available on the Web sites of PLoS Medicine at <http://www.plosmedicine.org/>, Annals of Internal Medicine at <http://www.annals.org/>, and Epidemiology at <http://www.epidem.com/>). Information on the STROBE Initiative is available at [www.strobe-statement.org](http://www.strobe-statement.org).

# BMJ Open

## A Cross-Sectional Study of All Clinicians' Conflict of Interest Disclosures to NHS Hospital Employers in England 2015-2016

|                                 |                                                                                                                                                                                                                                                                                                                                                                   |
|---------------------------------|-------------------------------------------------------------------------------------------------------------------------------------------------------------------------------------------------------------------------------------------------------------------------------------------------------------------------------------------------------------------|
| Journal:                        | <i>BMJ Open</i>                                                                                                                                                                                                                                                                                                                                                   |
| Manuscript ID                   | bmjopen-2017-019952.R1                                                                                                                                                                                                                                                                                                                                            |
| Article Type:                   | Research                                                                                                                                                                                                                                                                                                                                                          |
| Date Submitted by the Author:   | 24-Dec-2017                                                                                                                                                                                                                                                                                                                                                       |
| Complete List of Authors:       | Feldman, Harriet; Oxford University Hospitals NHS Foundation Trust<br>DeVito, Nicholas; University of Oxford Department of Primary Care Health Sciences<br>Mendel, Jonathan; University of Dundee, Geography<br>Carroll, David; Queen's University Belfast, Centre for Experimental Medicine<br>Goldacre, Ben; University of Oxford, Primary Care Health Sciences |
| <b>Primary Subject Heading</b>: | Health policy                                                                                                                                                                                                                                                                                                                                                     |
| Secondary Subject Heading:      | Research methods                                                                                                                                                                                                                                                                                                                                                  |
| Keywords:                       | Conflict of Interest, Gifts and Hospitality, Freedom of Information Act (FoIA), Pharmaceutical Industry, NHS Trusts                                                                                                                                                                                                                                               |
|                                 |                                                                                                                                                                                                                                                                                                                                                                   |

SCHOLARONE™  
Manuscripts

Only

**A Cross-Sectional Study of All Clinicians' Conflict of Interest Disclosures to NHS  
Hospital Employers in England 2015-2016**

Harriet Ruth Feldman, Nicholas J. DeVito, Jon Mendel, David E Carroll, Ben Goldacre

Dr Harriet Ruth Feldman  
Academic Foundation Trainee  
harriet.feldman@doctors.org.uk  
Oxford University Hospitals NHS Foundation Trust  
Headley Way  
Oxford  
OX3 7DH

Nicholas J DeVito  
Researcher  
nicholas.devito@phc.ox.ac.uk  
Centre for Evidence Based Medicine  
Department of Primary Care Health Sciences  
University of Oxford  
Radcliffe Observatory Quarter  
Woodstock Road  
Oxford OX2 6GG

Dr Jonathan Mendel,  
J.M.Mendel@dundee.ac.uk  
Lecturer  
School of Social Sciences,  
University of Dundee,  
Dundee DD1 4HN

Dr David E Carroll  
Academic Foundation Year 2 Doctor  
dcarroll06@qub.ac.uk  
Centre for Experimental Medicine  
Queen's University Belfast  
University Road  
Belfast  
BT7 1NN

Dr Ben Goldacre (corresponding)  
Senior Clinical Research Fellow  
ben.goldacre@phc.ox.ac.uk  
Centre for Evidence Based Medicine  
Department of Primary Care Health Sciences

1  
2  
3 University of Oxford  
4 Radcliffe Observatory Quarter  
5 Woodstock Road  
6 Oxford OX2 6GG  
7  
8  
9  
10

## 11 **Abstract**

12  
13  
14 *Objective:* We set out to document how NHS trusts in the UK record and share disclosures of  
15 conflict of interest by their employees.  
16

17  
18 *Design:* Cross-sectional study of responses to a Freedom of Information Act request for Gifts  
19 and Hospitality Registers.  
20

21  
22 *Setting:* NHS Trusts (secondary/tertiary care organisations) in England.  
23

24  
25 *Participants:* 236 Trusts were contacted, of which 217 responded.

26  
27 *Main Outcome Measures:* We assessed all disclosures for completeness and openness, scoring  
28 them for achieving each of five measures of transparency.  
29

30  
31 *Results:* 185 Trusts (78%) provided a register. 71 Trusts did not respond within the 28 day time  
32 limit required by the FoIA. Most COI registers were incomplete by design, and did not contain  
33 the information necessary to assess conflicts of interest. 126/185 (68%) did not record the  
34 names of recipients. 47/185 (25%) did not record the cash value of the gift or hospitality. Only  
35 31/185 registers (16%) contained the names of recipients, the names of donors, and the cash  
36 amounts received. 18/185 (10%) contained none of: recipient name, donor name, and cash  
37 amount. Only 15 Trusts had their disclosure register publicly available online (6%). We  
38 generated a transparency index assessing whether each Trust met the following criteria:  
39 responded on time; provided a register; had a register with fields identifying donor, recipient,  
40 and cash amount; provided a register in a format that allowed further analysis; and had their  
41 register publicly available online. Mean attainment was 1.9/5; no NHS trust met all five criteria.  
42  
43

44  
45 *Conclusion:* Overall, recording of employees' conflicts of interest by NHS trusts is poor. None of  
46 the NHS Trusts in England met all transparency criteria. 19 did not respond to our FoIA  
47 requests, 51 did not provide a Gifts and Hospitality Register and only 31 of the registers  
48 provided contained enough information to assess employees' conflicts of interest. Despite  
49 obligations on healthcare professionals to disclose conflicts of interest, and on organisations to  
50 record these, the current system for logging and tracking such disclosures is not functioning  
51 adequately. We propose a simple national template for reporting conflicts of interest, modelled  
52 on the US "Sunshine Act".  
53

54  
55 Word count: 354 words.  
56  
57  
58  
59  
60

## Strengths and Limitations of this Study

- We included all NHS Trusts in England.
- Responding to Freedom of Information Act (FoIA) requests is a statutory responsibility: we therefore yielded a high (91.9%) response rate.
- Trusts who did not respond to our FoIA request may have poorer COI disclosure practices: we may therefore have underestimated the extent of the problems identified.

## Abbreviations

ABPI - Association of the British Pharmaceutical Industry

AHP - Allied Health Professional

CCG - Clinical Commissioning Group

COI - Conflict of Interest

CPD - Continuing Professional Development

FoIA - Freedom of Information Act

PPSA - Physician Payment Sunshine Act

## Introduction

\$2.4 billion was given to US doctors by the pharmaceutical industry in 2015[1]. 48% of all doctors in the US received such payments, the majority of which were 'general' payments rather than payments for research. The motive for the pharmaceutical industry in spending this money is widely held to be marketing[2]. In the UK the 2015 spend has been reported by industry as £111 million, excluding payments for research[3]. Direct gifts and inducements have been prohibited since 2010 by the Association of the British Pharmaceutical Industry (ABPI), an industry membership organisation that has also become a voluntary regulator of the pharmaceutical industry[4]. However, pharmaceutical companies can still pay doctors and other clinicians[5,6] to deliver Continuing Professional Development (CPD) lectures or sponsor their attendance at conferences. They can directly provide 'training' or 'updates' to clinicians, often accompanied by generous catering. They can also sponsor educational and academic events within hospitals, provide restaurant meals, and send marketing staff (commonly known as 'drug reps') to meet with doctors directly. Recent systematic reviews[7,8] have found an association between contact between prescribers and the pharmaceutical industry and a decrease in their prescribing quality, or an increase in inappropriate prescribing and prescribing cost.

1  
2  
3 Doctors and other healthcare professionals are required to declare all financial conflicts of  
4 interest so that their appropriateness, and any possible impact on professional behaviour, can  
5 be assessed independently and transparently. The Physician Payment Sunshine Act (PPSA)  
6 Act in the US requires that all payments to doctors are declared onto a single central database  
7 that is openly accessible. UK guidelines are more fragmented. The GMC[9], and some other  
8 professional organisations[10,11] require healthcare providers to declare any potential conflict of  
9 interest to both their patients and their employers. NHS England circulated 'Standards of  
10 Business Conduct' to NHS trusts in 1993[12], which stipulates that all NHS staff 'should' declare  
11 potential conflicts of interest to their employers, and that these 'should' be recorded in a Gifts  
12 and Hospitality Register. NHS trusts administer hospitals, mental health and specialist  
13 community services and employ many of the healthcare professionals in the UK. The NHS  
14 England guidelines are not binding on trusts, although many do incorporate them into local  
15 guidelines and therefore staff contracts. Industry transparency requirements are similarly  
16 problematic. In 2016 the ABPI released a database of all payments by UK pharmaceutical  
17 companies to healthcare professionals. However, those in receipt of these payments could opt  
18 out of having their name declared on this database, leaving the payment recorded only in  
19 aggregate for each company. This, and other problems with the database, means that it  
20 provides an "illusion of transparency" rather than an auditable resource[13].  
21  
22  
23  
24  
25

26 Given the problems with industry disclosure it is hoped that declarations to NHS trusts might  
27 provide a better route for transparency around industry payments to healthcare professionals.  
28 There has never been a systematic examination of the existence and contents of these  
29 registers. We therefore set out to request and describe all UK NHS Gifts and Hospitality  
30 registers.  
31  
32

## 33 **Methods**

34  
35 Our objectives were to: request all COI registers from all English NHS trusts; describe whether  
36 they were delivered; assess the contents and structure of hospitals' disclosure registers; and  
37 generate summary statistics describing disclosures overall.  
38  
39

### 40 *Obtaining COI registers*

41 We sent all 236 NHS Trusts in the UK a Freedom of Information Act (FOIA) request asking for a  
42 copy of their Gifts and Hospitality Register for the financial year 2015/16. No Trusts were  
43 excluded. We also requested the number of staff members who have been the subject of  
44 internal investigations or disciplinary proceedings in relation to purported conflicts of interest, or  
45 the failure to declare them, and the outcomes of these investigations or proceedings. The  
46 Freedom of Information Requests were sent out in the two weeks after 9<sup>th</sup> July 2016. Contact  
47 details were obtained from each Trust's website and placed into a spreadsheet; a Google Apps  
48 script was then used to send standardised emails to each Trust[14]. We logged replies until mid-  
49 November 2016. Trusts which did not reply were followed up twice. Summary statistics are  
50 presented on the proportion of Trusts sending their COI register in total; and the proportion  
51 responding within the timescale stipulated by the Act (20 working days). We describe the  
52 proportion invoking section 12 to avoid disclosing (a refusal on grounds of cost), and those  
53  
54  
55  
56  
57  
58  
59  
60

1  
2  
3 citing section 40 to remove names from the register (on grounds of privacy). We also logged  
4 those trusts who directed us to the ABPI's summary disclosure database on which healthcare  
5 professionals can choose to have their payments anonymised.  
6

### 8 *Assessing the contents and structure of hospitals' disclosure registers.*

9 We extracted the following structured data to describe the contents of each hospital's disclosure  
10 register: the format the information was delivered in (PDF, document, spreadsheet, scans of  
11 handwritten sheets, or text within an email); and the completeness of information given about  
12 each individual disclosure (the name of the recipient, the name of the company providing the gift  
13 or hospitality, the cash amount of the gift). In addition, we noted whether the register was  
14 already publicly available online. We also checked each register for any identifying patient data.  
15 We generated summary statistics to describe these contents. Data extraction was performed by  
16 one of the authors (HRF). Standards and classifications were discussed with other authors (NJD  
17 and BG) before data were extracted. We generated a transparency index assessing whether  
18 each Trust met the following criteria: (1) responded on time; (2) provided a register; (3) had a  
19 register with fields identifying donor, recipient, and cash amount; (4) provided a register in a  
20 format that allowed further analysis; and (5) had their register publicly available online.  
21  
22  
23  
24

### 25 *Summary Statistics on Disclosures*

26 Because the data provided was in multiple formats, and frequently not structured, it could not be  
27 aggregated for analysis. One author (HRF) manually transcribed data from a random sample of  
28 20 Trust's disclosures and generated summary statistics on: the number of disclosures per  
29 Trust; the size of each individual disclosure; the profession of those making disclosures; and the  
30 source of the payment (industry or patient). This sample size was chosen to represent  
31 approximately 10% of disclosures, and was limited by researcher time. Where names of staff  
32 were given but not job roles, organisation web pages were used to try to ascertain the  
33 profession of the individual making the disclosure. The field of commercial entities was  
34 ascertained through their company webpages. Where a range of cash values were given (e.g.  
35 '<£50') the upper value was used.  
36  
37  
38

### 39 *Analysis*

40 All analyses were conducted in Google Sheets.  
41  
42

### 43 *Patient involvement*

44 No patients were involved in setting the research question or the outcome measures, nor were  
45 they involved in the design or conduct of the study. No patients were asked to advise on  
46 interpretation or writing up of results. There are no plans to disseminate the results of the  
47 research to study participants.  
48  
49

## 50 **Results**

### 51 *Obtaining Trust Disclosure Registers*

52  
53 Of the 236 trusts sent a Freedom of Information request, 217 responded (91.9%). 185 Trusts  
54 (78.4%) provided a copy of their Gifts and Hospitality register for the financial year 2015/16. 10  
55  
56  
57  
58  
59  
60



Trusts (4.2%) declined to share their disclosure register and invoked Section 12 of the FoIA, an exemption available where a public body can assert that the cost of collating and sharing information would exceed £450. Other reasons given for not providing a Gifts and Hospitality register included: no register was held (18/217, 8.3%); the register contained no entries (5/217, 2.3%); the register was on paper only (5/217, 2.3%); and other reasons (3/217, 1.3%). Of those trusts that did not hold a register, two claimed it was not needed because their staff were contractually prohibited from accepting such payments, and six Trusts sent data from the ABPI instead. In three of these cases, a version of the ABPI database was sent with the names of the recipients redacted, even though this information is freely available online with names unredacted. 12 Trusts (5.5%) suggested that we refer to the ABPI database for further or more complete information.

#### *Contents and structure of hospitals' disclosure registers.*

Of the 185 registers received, only 31/185 (16.7%) were complete – containing fields recording the name of the recipient, the name of the donor and the cash amount received. However, even when there were fields to record these data, incomplete records were common. 126 registers (68.1%) did not have a field for the name of the recipient. 14 Trusts (7.6%) explicitly stated that they had redacted this field under Section 40 of the Freedom of Information Act, arguing that it constituted personal information. Some Trusts redacted only the names of staff under a certain pay band. 59 registers (31.9%) did not have a field for the name of the donor. 47 registers (25.4%) did not have a field for the cash value of the gift or hospitality. The overlap between these elements is shown in a Venn diagram in Figure 1. Of note, 18 registers (9.7%) contained none of: recipient name, donor name, or declaration of the cash amount received.

The proportion of Trusts meeting each of our five transparency criteria is given in Table 1; the distribution of the total number of criteria met is given in Figure 2. Mean attainment was 1.9/5. No NHS trust met all five criteria.

**Table 1: Number and percentage of Trusts achieving each transparency criteria.**

| Transparency Element                                              | Number of Trusts Achieving Criteria | Proportion of Trusts Achieving Criteria |
|-------------------------------------------------------------------|-------------------------------------|-----------------------------------------|
| Responded on time                                                 | 165                                 | 69.9%                                   |
| Provided a register                                               | 185                                 | 78.4%                                   |
| Contained fields for named donor, named recipient and cash amount | 31                                  | 13.1%                                   |

|                                                                                         |    |       |
|-----------------------------------------------------------------------------------------|----|-------|
| Provided the register in a format that allowed further analysis (i.e. spreadsheet, csv) | 53 | 22.5% |
| Made register publicly available online                                                 | 15 | 6.4%  |

### *Breaches of Patient Confidentiality in Trust Responses*

11/185 (5.9%) of the registers contained information which could potentially breach patient confidentiality - for example, giving the name of the patient or relative who had given a gift to a healthcare professional. To protect patients' confidentiality we have therefore removed the disclosures made by these Trusts from our shared dataset.

### *Data on Disciplinary Hearings*

199 trusts returned information on the number of disciplinary hearings related to conflict of interest. Of these, 174 had had none. The mean number per Trust was 0.2. The definition of 'conflict of interest' was interpreted broadly by Trusts and included actions such as having a second job and working while on sick leave.

### *Summary Statistics on Disclosures*

Data from 20 trusts was transcribed into spreadsheet format to produce summary statistics. The registers transcribed contained a mean of 30.8 entries (range 4-175, total 616). 428 entries gave the cash amount of the declaration, totalling £162,245 - a mean declaration size of £379. However, there was substantial rightward skew with a median declaration of £127.50 and 122 entries with value £30 or less. Further data about the sources and recipients of the payments on these registers is shown in figure 3.

### *Trusts With a "Zero" Disclosure*

Unexpectedly, five trusts stated that they had no entries on their register, and another two delivered empty registers. For those trusts which described or returned no entries, we found 230 records in the ABPI disclosure database relating to payments to individuals employed at these Trusts, totalling £119,851.35. In addition, we found 107 records of payments to these trusts directly, an average of £22,293 per trust.

Two of these trusts stated that a disclosure register was not needed as their policies prohibited staff from taking such payments. One, East London Foundation Trust, stated: "*Trust Policy prohibits the acceptance of payments from pharmaceutical companies to members of staff. We therefore have no such register.*" A search of the ABPI database (dated 19/04/2017) returned 7 payments to 5 individuals who registered their institution as East London Foundation Trust, with a total value of £2050.63. Hertfordshire Community NHS Foundation Trust stated: "*We do not have a "gifts" register, as under the Trust's Standards of Business Conduct Policy (previously supplied) a gift is either acceptable (in which case it doesn't need to be reported) or it is not*

1  
2  
3 *acceptable.*” A search of the ABPI database returned 5 payments to 4 individuals who  
4 registered their institution as Hertfordshire Community NHS Foundation Trust, totalling £734.43.  
5 Since clinicians are permitted to withhold disclosure of their data on the ABPI, and non-  
6 disclosure rates on the ABPI database are high, this is likely to be an incomplete list.  
7  
8

### 9 *Data Sharing*

10 All responses[15] and all analyses[16] are shared on FigShare. Where we have concerns that  
11 Trusts have breached patient confidentiality in their returns, we have redacted any potential  
12 personal information. In order to illustrate the issues described in summary text above we have  
13 also shared a range of illustrative examples[17]: an example of a register which mostly lists  
14 trivial gifts from patients (3.1), a register which mostly discloses additional employment (3.2), a  
15 register which covers only board members and not staff (3.3), and data structure which is  
16 almost impenetrable to analysis and audit (3.4).  
17  
18

## 19 **Conclusion**

### 20 *Summary of Findings*

21 Overall, recording of the interests of employees by NHS trusts is poor. None of the NHS Trusts  
22 in England met all transparency criteria by: 1) responding on time; 2) providing a register; 3) that  
23 register having a complete data structure; 4) providing the data in a reusable (spreadsheet)  
24 format; 5) making the register publicly available online. 59/185 trusts did not record the donor of  
25 the payment or hospitality, which makes it impossible to assess the conflict of interest. 18 trusts  
26 did not hold a disclosure register at all.  
27  
28  
29  
30  
31

### 32 *Strengths and limitations of the study design*

33 The use of a statutory framework - the Freedom of Information Act (FoIA) - led to a very high  
34 (91.9%) response rate in this study. The presence of missing data is in itself informative:  
35 responses that were absent or incomplete are an important finding. However, it is possible that  
36 Trusts which failed to respond to a FoIA request are also failing on other administrative issues,  
37 and that the absence of their disclosures may result in our study underestimating the problems  
38 with Trust registers, by only coding those from Trusts which did respond.  
39  
40  
41

### 42 *Findings in context*

43 We have previously outlined the problems with the ABPI's "Disclosure UK" as a platform for  
44 reporting conflicts of interest in particular that healthcare professionals can choose to redact  
45 themselves from that dataset, and routinely do so[13]. Barriers to accessing UK COI data mean  
46 that there is little prior work analysing such disclosures. In the US, disclosures are managed on  
47 a national level by the federal government. The PPSA was passed as part of the Patient  
48 Protection and Affordable Care Act in 2010[18]. The PPSA required industry to report all  
49 payments to doctors (but not other healthcare professionals, who also receive significant  
50 attention from pharmaceutical marketing[5,6]) and teaching hospitals in excess of \$10, to the  
51 Centers for Medicare and Medicaid Services (CMS). This includes payments for "general"  
52 categories such as educational materials or food and beverage, as well as funding for research  
53 and ownership stakes in the reporting entities. CMS then makes this data available through the  
54  
55  
56  
57  
58  
59  
60

publicly searchable Open Payments website. The Open Payments website[19] currently houses all reported payments from August 1, 2013 to 31st December 2016. Over this time, the Open Payments database has grown to include details of nearly \$25 billion worth of payments to doctors and teaching hospitals including \$7,001,435,854 in general payments to 905,238 individual doctors. For the full 3.5 years covered by the PPSA, the mean number of payments to doctors is 43 and the mean amount received is \$7,734.36[20].

The comprehensive and accessible nature of Open Payments has allowed researchers to assess and quantify the impact of pharmaceutical payments. For example, there is a dose-response relationship between receiving more pharmaceutical payment and increased prescribing cost[21] and branded drug prescribing[22], which has been demonstrated by linking publicly available Medicare prescribing data with Open Payments data[23]. Others have used the data to characterize industry payments within their specialty[24,25] or auditing targeted groups such as guideline authors[26,27]. While the program is still new, there is evidence that industry spending may be decreasing since the launch of Open Payments[28,29]. Some researchers are even beginning to use PPSA data to examine association between relationships with industry and clinical practice[30]. The public availability of the data has also been an asset to investigative journalism into the medical profession[31,32].

However, the PPSA and Open Payments have faced criticisms. They exclude non-doctor prescribers from required reporting[5,6,33] and have been unpopular with some doctors[34]. As the US experience shows, creating centralised and standardised disclosure databases for physicians presents challenges around how to collect, validate, and present data in accurate, useful, and meaningful ways. These difficulties, however, should not dissuade attempts to improve upon the current status quo on countries like the UK. As our findings show, when disclosure is required only through broad, unspecific, and unenforced regulations its utility and accessibility is greatly compromised. Efforts like the ABPI database also fall short of a program like Open Payments as it is a voluntary endeavor without the authority of the state to require reporting and compel compliance. These limitations preclude the prospect of any comprehensive research on the state of COI in the UK, an area that is flourishing in the US among more comprehensive disclosure standards and despite programmatic limitations.

### *Interpretation and Policy Implications*

The current system of piecemeal private declarations to NHS employers, and optional declarations through the ABPI's "Disclosure UK", is not delivering transparency on COI in the UK. Through our analysis of these records, we identify four main barriers to transparency.

Firstly, there is no central system for disclosures to employers. This allows wide variations in the standards of reporting and recording COI. Many healthcare professionals will also have more than one public sector employer simultaneously, or sequentially over a short time period. Declaring separately with each employer makes it unlikely that any one organisation will have access to full information about their employees. Secondly, there is poor auditing of records, and a lack of evidence that contents are reflected on locally. Most Trusts allowed incomplete records to be returned, seemed not to compare their declarations with other sources such as

1  
2  
3 the ABPI database, and appeared happy to accept implausibly empty registers. If this  
4 information is collected but not examined or acted upon, there is a risk that this gives an  
5 unwarranted appearance of transparency and rigorous management. Thirdly, the variation in  
6 types of information disclosed and how it was presented suggests that there is lack of clarity  
7 about what constitutes a COI; and a lack of consensus around how to handle diverse categories  
8 of COI such as income from private work, interactions with industry, and gifts from patients.  
9 Lastly, COI records are generally not made public. Most Trusts did not place their registers on  
10 the internet, and most did not give the names of recipients on their COI register.  
11  
12  
13

14 Some NHS Trusts cited the Freedom of Information Act as a reason to withhold the identity of  
15 recipients, specifically Section 40 of the Act, which aims to protect individuals' personal privacy.  
16 In our view there are good grounds to argue that this is not a legitimate use of Section 40:  
17 employees were largely acting in a professional capacity when they received payments;  
18 disclosure represents a legitimate public interest; FoIA emphasises the importance of  
19 "transparency and accountability" when considering personal data disclosure; healthcare  
20 professionals have existing disclosure obligations to professional regulators (for example, the  
21 GMC requires doctors to inform their patients about any conflicts of interest); and staff  
22 expectations at the time of disclosure to a Trust are therefore likely to have been that this COI  
23 information should or could be made public. These issues can be resolved through an extensive  
24 process of appeals to the Information Commissioner, although this process may take years  
25 rather than months.  
26  
27  
28

29 On 9th February 2017, NHS England published new guidance about managing conflict of  
30 interest within the NHS[35]. This guidance aims to offer more complete and consistent principles  
31 for managing COI in NHS Trusts, CCGs and NHS England. The guidance emphasises that  
32 declarations must be collected and recorded, and recommends that it is published (with names  
33 of staff) on an organisation's website. However, this guidance is not binding on Trusts, and each  
34 organisation is free to adopt whatever standards it wishes. There is no proposal that the data  
35 should be centralised. The template disclosures ask for a 'description' of the interest in a single  
36 text field meaning that information can be omitted, or shared as unstructured free text, meaning  
37 that work done in the US on structured open data would continue to be impossible for UK  
38 disclosures. There is no guidance on identifying and managing the impact of pharmaceutical  
39 gifts and hospitality on prescribing. The new NHS COI policy would therefore not resolve the  
40 lack of transparency identified by our study.  
41  
42  
43  
44

45 We propose that the UK should ideally follow the lead set by the US, requiring simple annual  
46 compulsory disclosure of all financial COI by NHS healthcare professionals and donors to a  
47 central openly accessible database of COI, recording cash value, type of COI, donor, and  
48 recipient. Short of this, the GMC could remind doctors and Trusts that they expect the GMC  
49 requirement for open disclosure of COIs to patients to be upheld, and clarify that complete and  
50 openly shared NHS Trust COI registers allow doctors to meet their GMC requirements. This  
51 could be done with no changes to either legislation or the GMC document "Good Medical  
52 Practice", which states: "you must be honest in financial and commercial dealings with patients  
53 employers, insurers and other organisations or individuals" and "if you are faced with a conflict  
54 of interest, you must be open about the conflict, declaring your interest formally."  
55  
56  
57  
58  
59

1  
2  
3 Lastly, since COI is an issue for all those working in healthcare, not only doctors, we propose  
4 that it would be desirable to create and encourage the use of an openly accessible voluntary  
5 register where any healthcare professional, manager, or researcher in the UK could openly log  
6 their conflicts of interest in a structured searchable format as has been previously proposed for  
7 researchers in various territories[36–38]. We are now seeking funds to deliver and maintain  
8 such a database.  
9

### 10 11 *Future directions*

12 We aim to repeat this study to assess the impact of the new NHS guidance on disclosure, while  
13 acknowledging that such change is unlikely for the reasons given above. We also aim to expand  
14 our study to include Primary Care, where 55% of UK prescribing costs occur[39], by assessing  
15 the recording of COI by Clinical Commissioning Groups (CCGs). This has received attention  
16 recently after an audit in April 2016 showed that COI were inconsistently recorded within CCGs,  
17 and new binding guidance was released in July 2016[40].  
18  
19

### 20 21 *Conclusions*

22 Information on COI is poorly collected, poorly managed, and poorly disclosed by NHS Trusts in  
23 England. The ongoing absence of transparency around COI in the UK may undermine public  
24 trust in the healthcare professions. Simple clear legislation and a requirement for open  
25 disclosure of COI to a central body, similar to that in the US, would present a simple and  
26 effective solution.  
27  
28  
29

### 30 31 **Acknowledgements and Contributions**

32 BG conceived the study with JM and DEC, who undertook a pilot audit in 2012. BG and HRF  
33 designed the study. HRF collected and analysed the data with input from ND and BG. HRF  
34 drafted the manuscript. All authors contributed to and approved the final manuscript. BG and  
35 HRF conceived the associated website resource which was built by Seb Bacon. BG supervised  
36 the project. BG and HRF are guarantors.  
37  
38

### 39 40 **Competing Interests Statement:**

41 All authors have completed the ICMJE uniform disclosure form at  
42 [www.icmje.org/coi\\_disclosure.pdf](http://www.icmje.org/coi_disclosure.pdf) and declare the following: JM reports grants from Oak  
43 Foundation, NordForsk, ESRC and Netherlands Organisation for Scientific Research, and  
44 grants and other from Scottish Institute for Policing Research. JM has received a very small  
45 additional income (under £150 in total) for writing about problems around evidence and policy.  
46 These are all outside the submitted work. BG is funded by the Laura and John Arnold  
47 Foundation to conduct work on research integrity, but not specifically this project. No funder had  
48 any involvement in the study design or the decision to submit. BG has also received funding  
49 from the Wellcome Trust, the NHS National Institute for Health Research, the Health  
50 Foundation, and the World Health Organisation; he also receives personal income from  
51 speaking and writing for lay audiences on the misuse of science. ND is employed on BG's grant  
52 from LJAF. HRF has received research funding from the Wellcome Trust, Green Templeton  
53 College, Guarantors of Brain and Oxford University Clinical Academic Graduate School. DEC  
54 has received research funding from the Jean Shanks Foundation and the Wellcome Trust. He  
55  
56  
57  
58  
59

1  
2  
3 has received software development funding from the Open Society Foundations, Jisc and the  
4 Public Library of Science (PLOS). He has received travel funding from PLOS and the Scholarly  
5 Publishing and Academic Resources Coalition.  
6  
7

### 8 **Transparency Declaration:**

9 The lead author affirms that the manuscript is an honest, accurate, and transparent account of  
10 the study being reported; that no important aspects of the study have been omitted; and that  
11 any discrepancies from the study as planned have been explained. We confirm that this report  
12 is compliant with the STROBE guidelines for reporting observational research.  
13  
14

### 15 **Licensing:**

16 The Corresponding Author has the right to grant on behalf of all authors and does grant on  
17 behalf of all authors, a worldwide licence  
18 (<http://www.bmj.com/sites/default/files/BMJ%20Author%20Licence%20March%202013.doc>) to  
19 the Publishers and its licensees in perpetuity, in all forms, formats and media (whether known  
20 now or created in the future), to i) publish, reproduce, distribute, display and store the  
21 Contribution, ii) translate the Contribution into other languages, create adaptations, reprints,  
22 include within collections and create summaries, extracts and/or, abstracts of the Contribution  
23 and convert or allow conversion into any format including without limitation audio, iii) create any  
24 other derivative work(s) based in whole or part on the on the Contribution, iv) to exploit all  
25 subsidiary rights to exploit all subsidiary rights that currently exist or as may exist in the future in  
26 the Contribution, v) the inclusion of electronic links from the Contribution to third party material  
27 where-ever it may be located; and, vi) licence any third party to do any or all of the above. All  
28 research articles will be made available on an Open Access basis (with authors being asked to  
29 pay an open access fee—see [http://www.bmj.com/about-bmj/resources-authors/forms-policies-  
30 and-checklists/copyright-open-access-and-permission-reuse](http://www.bmj.com/about-bmj/resources-authors/forms-policies-and-checklists/copyright-open-access-and-permission-reuse)). The terms of such Open Access  
31 shall be governed by a Creative Commons licence—details as to which Creative Commons  
32 licence will apply to the research article are set out in our worldwide licence referred to above.  
33  
34  
35  
36  
37

### 38 **Ethical Approval:**

39 None required.  
40  
41

### 42 **Funding Statement**

43 This research received no specific grant from any funding agency in the public, commercial or  
44 not-for-profit sectors.  
45  
46

### 47 **Data Sharing:**

48 All underlying data and analysis is shared alongside this manuscript on FigShare.  
49  
50

### 51 **Supplementary Materials**

52 All supplementary materials can be found on Figshare.  
53  
54

### 54 **Figure legends**

55  
56  
57  
58  
59  
60

1  
2  
3 Figure 1: Venn diagram showing the information contained in the registers received.  
4

5 Figure 2: Distribution of total number of transparency criteria met, across all NHS Trusts.  
6

7  
8 Figure 3: Recipients and sources of the payments disclosed in the 20 randomly selected  
9 registers we quantified  
10

## 11 12 13 References

- 14 1 Tringale KR, Marshall D, Mackey TK, *et al.* Types and Distribution of Payments From Industry to  
15 Physicians in 2015. *JAMA* 2017;**317**:1774–84.  
16
- 17 2 Kremer STM, Bijmolt THA, Leeflang PSH, *et al.* Generalizations on the effectiveness of  
18 pharmaceutical promotional expenditures. *International Journal of Research in Marketing*  
19 2008;**25**:234–46.  
20
- 21 3 Hawkes N. Doctors getting biggest payments from drug companies don't declare them on new  
22 website. *BMJ* 2016;**354**:i3679.  
23
- 24 4 code\_of\_practice\_2016.pdf. [http://www.abpi.org.uk/our-](http://www.abpi.org.uk/our-work/library/guidelines/Documents/code_of_practice_2016.pdf)  
25 [work/library/guidelines/Documents/code\\_of\\_practice\\_2016.pdf](http://www.abpi.org.uk/our-work/library/guidelines/Documents/code_of_practice_2016.pdf)  
26
- 27 5 Grundy Q, Bero L, Malone R. Interactions between non-physician clinicians and industry: a  
28 systematic review. *PLoS Med* 2013;**10**:e1001561.  
29
- 30 6 Grundy Q, Bero LA, Malone RE. Marketing and the Most Trusted Profession: The Invisible  
31 Interactions Between Registered Nurses and Industry. *Ann Intern Med* 2016;**164**:733–9.  
32
- 33 7 Brax H, Fadlallah R, Al-Khaled L, *et al.* Association between physicians' interaction with  
34 pharmaceutical companies and their clinical practices: A systematic review and meta-analysis. *PLoS*  
35 *One* 2017;**12**:e0175493.  
36
- 37 8 Spurling GK, Mansfield PR, Montgomery BD, *et al.* Information from pharmaceutical companies and  
38 the quality, quantity, and cost of physicians' prescribing: a systematic review. *PLoS Med*  
39 2010;**7**:e1000352.  
40
- 41 9 Good medical practice. [http://www.gmc-uk.org/static/documents/content/GMP\\_.pdf](http://www.gmc-uk.org/static/documents/content/GMP_.pdf)  
42
- 43 10 The Code for nurses and midwives. [https://www.nmc.org.uk/globalassets/sitedocuments/nmc-](https://www.nmc.org.uk/globalassets/sitedocuments/nmc-publications/nmc-code.pdf)  
44 [publications/nmc-code.pdf](https://www.nmc.org.uk/globalassets/sitedocuments/nmc-publications/nmc-code.pdf)  
45
- 46 11 standards\_for\_pharmacy\_professionals\_may\_2017\_0.pdf.  
47 [https://www.pharmacyregulation.org/sites/default/files/standards\\_for\\_pharmacy\\_professionals\\_may\\_](https://www.pharmacyregulation.org/sites/default/files/standards_for_pharmacy_professionals_may_2017_0.pdf)  
48 [2017\\_0.pdf](https://www.pharmacyregulation.org/sites/default/files/standards_for_pharmacy_professionals_may_2017_0.pdf)  
49
- 50 12 Executive M. for NHS staff.  
51 [http://webarchive.nationalarchives.gov.uk/20130107105354/http://www.dh.gov.uk/prod\\_consum\\_dh/g](http://webarchive.nationalarchives.gov.uk/20130107105354/http://www.dh.gov.uk/prod_consum_dh/groups/dh_digitalassets/@dh/@en/documents/digitalasset/dh_4065045.pdf)  
52 [roups/dh\\_digitalassets/@dh/@en/documents/digitalasset/dh\\_4065045.pdf](http://webarchive.nationalarchives.gov.uk/20130107105354/http://www.dh.gov.uk/prod_consum_dh/groups/dh_digitalassets/@dh/@en/documents/digitalasset/dh_4065045.pdf)  
53
- 54 13 Kmietowicz Z. Disclosure UK website gives 'illusion of transparency,' says Goldacre. *BMJ*  
55 2016;**354**:i3760.  
56
- 57 14 Feldman H, Goldacre B, DeVito N. Appendix 1. *figshare* Published Online First: 22 December 2017.  
58 doi:10.6084/m9.figshare.5160643.v1  
59  
60



- 1
- 2
- 3 15 Feldman H, Goldacre B, DeVito N. Appendix 2. *figshare* Published Online First: 22 December 2017.  
4 doi:10.6084/m9.figshare.5160589
- 5
- 6 16 Feldman H, Goldacre B, DeVito N. Appendix 4. *figshare* Published Online First: 22 December 2017.  
7 doi:10.6084/m9.figshare.5160592.v1
- 8
- 9 17 Feldman H, Goldacre B, DeVito N. Appendix 3. *figshare* Published Online First: 22 December 2017.  
10 doi:10.6084/m9.figshare.5160622.v1
- 11
- 12 18 Agrawal S, Brown D. The Physician Payments Sunshine Act--Two Years of the Open Payments  
13 Program. *N Engl J Med* 2016;**374**:906–9.
- 14
- 15 19 index. Published Online First: 8 August 2016.<https://www.cms.gov/openpayments/> (accessed 14 Jun  
16 2017).
- 17
- 18 20 Devito NJ. OpenPayments\_General Payment Data Through 2016.zip. *figshare* Published Online  
19 First: 2017. doi:10.6084/m9.figshare.5230489.v1
- 20
- 21 21 Perlis RH, Perlis CS. Physician Payments from Industry Are Associated with Greater Medicare Part  
22 D Prescribing Costs. *PLoS One* 2016;**11**:e0155474.
- 23
- 24 22 Qian J, Hansen RA, Surry D, *et al.* Disclosure of industry payments to prescribers: industry payments  
25 might be a factor impacting generic drug prescribing. *Pharmacoepidemiol Drug Saf* Published Online  
26 First: 9 May 2017. doi:10.1002/pds.4224
- 27
- 28 23 Grochowski Jones R, Ornstein C. Matching Industry Payments to Medicare Prescribing Patterns: An  
29 Analysis. Pro Publica 2016.
- 30
- 31 24 Chang JS. The Physician Payments Sunshine Act: data evaluation regarding payments to  
32 ophthalmologists. *Ophthalmology* 2015;**122**:656–61.
- 33
- 34 25 Weiner JA, Cook RW, Hashmi S, *et al.* Factors associated with financial relationships between Spine  
35 Surgeons and Industry: An Analysis of the Open Payments Database. *Spine* Published Online First:  
36 1 February 2017. doi:10.1097/BRS.0000000000002121
- 37
- 38 26 Ramzi Dudum GWU, Omar Harfouch GWU, Heather A. Young GWU, *et al.* ACC/AHA Guideline  
39 Authors Self-Disclosed Relationships Compared to the Open Payments Database: Do Discrepancies  
40 Represent Undisclosed Conflicts of Interest? In: *GW Research Days 2016 - Present*. 2016.  
41 [http://hsrc.himmelfarb.gwu.edu/gw\\_research\\_days/2016/SMHS/60](http://hsrc.himmelfarb.gwu.edu/gw_research_days/2016/SMHS/60) (accessed 15 Jun 2017).
- 42
- 43 27 Mitchell AP, Basch EM, Dusetzina SB. Financial Relationships With Industry Among National  
44 Comprehensive Cancer Network Guideline Authors. *JAMA Oncol* 2016;**2**:1628–31.
- 45
- 46 28 Brockbank B, Amendola MF. IP175. Is There a Difference in Device- and Medication-Related  
47 Payments Made to Vascular Surgeons and Interventional Radiologists? Insights from the Open  
48 Payments Database. *J Vasc Surg* 2017;**65**:102S.
- 49
- 50 29 Gangopadhyay N, Chao AH. Abstract: The Impact of the Sunshine Act Open Payments Database on  
51 Industry Financial Relationships in Plastic Surgery. *Plastic and Reconstructive Surgery Global Open*  
52 2016;**4**. doi:10.1097/01.GOX.0000502909.01781.d0
- 53
- 54 30 Weiner JA, Cook RW, Hashmi S, *et al.* The Effects of Conflicts of Interest on Practice Patterns and  
55 Complication Rates in Spine Surgery. *Spine* Published Online First: 11 May 2017.  
56 doi:10.1097/BRS.0000000000002227
- 57
- 58 31 Ellis B, Hicken M, Hernandez S. How CNN reported on Nuedexta. CNN.  
59 2017.<http://edition.cnn.com/2017/10/12/health/nuedexta-methodology-invs/index.html>
- 60

- 1  
2  
3 32 Bankhead C. Derm Guideline Authors' Financial Info Questioned - Industry payments common, often  
4 reported inaccurately. *Medpage Today*.  
5 2017. <https://www.medpagetoday.com/publichealthpolicy/ethics/68640>  
6  
7 33 Ladd E, Hoyt A. Shedding Light on Nurse Practitioner Prescribing. *J Nurse Pract* 2016;**12**:166–73.  
8  
9 34 Chimonas S, DeVito NJ, Rothman DJ. Bringing Transparency to Medicine: Exploring Physicians'  
10 Views and Experiences of the Sunshine Act. *Am J Bioeth* 2017;**17**:4–18.  
11  
12 35 NHS England PowerPoint template. [https://www.england.nhs.uk/wp-](https://www.england.nhs.uk/wp-content/uploads/2017/02/guidance-managing-conflicts-of-interest-nhs.pdf)  
13 [content/uploads/2017/02/guidance-managing-conflicts-of-interest-nhs.pdf](https://www.england.nhs.uk/wp-content/uploads/2017/02/guidance-managing-conflicts-of-interest-nhs.pdf)  
14  
15 36 Dunn AG. Set up a public registry of competing interests. *Nature* 2016;**533**:9.  
16  
17 37 Dunn AG, Coiera E, Mandl KD, *et al*. Conflict of interest disclosure in biomedical research: A review  
18 of current practices, biases, and the role of public registries in improving transparency. *Res Integr*  
19 *Peer Rev* 2016;**1**. doi:10.1186/s41073-016-0006-7  
20  
21 38 Lichter AS, McKinney R. Toward a harmonized and centralized conflict of interest disclosure:  
22 progress from an IOM initiative. *JAMA* 2012;**308**:2093–4.  
23  
24 39 2015/ E. Prescribing Costs in Hospitals and the Community.  
25 <http://www.content.digital.nhs.uk/catalogue/PUB22302/hosp-pres-eng-201516-report.pdf>  
26  
27 40 revsd-coi-guidance-june16.pdf. [https://www.england.nhs.uk/commissioning/wp-](https://www.england.nhs.uk/commissioning/wp-content/uploads/sites/12/2016/06/revsd-coi-guidance-june16.pdf)  
28 [content/uploads/sites/12/2016/06/revsd-coi-guidance-june16.pdf](https://www.england.nhs.uk/commissioning/wp-content/uploads/sites/12/2016/06/revsd-coi-guidance-june16.pdf)  
29  
30  
31  
32  
33  
34  
35  
36  
37  
38  
39  
40  
41  
42  
43  
44  
45  
46  
47  
48  
49  
50  
51  
52  
53  
54  
55  
56  
57  
58  
59  
60

1  
2  
3  
4  
5  
6  
7  
8  
9  
10  
11  
12  
13  
14  
15  
16  
17  
18  
19  
20  
21  
22  
23  
24  
25  
26  
27  
28  
29  
30  
31  
32  
33  
34  
35  
36  
37  
38  
39  
40  
41  
42  
43  
44  
45  
46  
47  
48  
49  
50  
51  
52  
53  
54  
55  
56  
57  
58  
59  
60

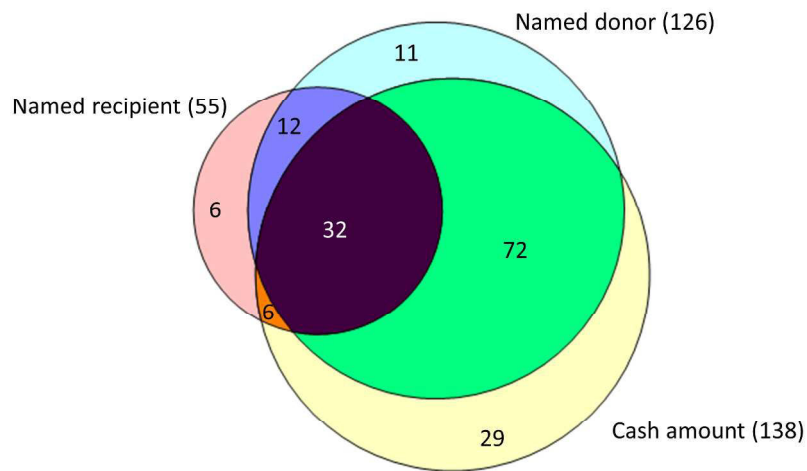

Venn diagram showing the information contained in the registers received.

254x190mm (300 x 300 DPI)

1  
2  
3  
4  
5  
6  
7  
8  
9  
10  
11  
12  
13  
14  
15  
16  
17  
18  
19  
20  
21  
22  
23  
24  
25  
26  
27  
28  
29  
30  
31  
32  
33  
34  
35  
36  
37  
38  
39  
40  
41  
42  
43  
44  
45  
46  
47  
48  
49  
50  
51  
52  
53  
54  
55  
56  
57  
58  
59  
60

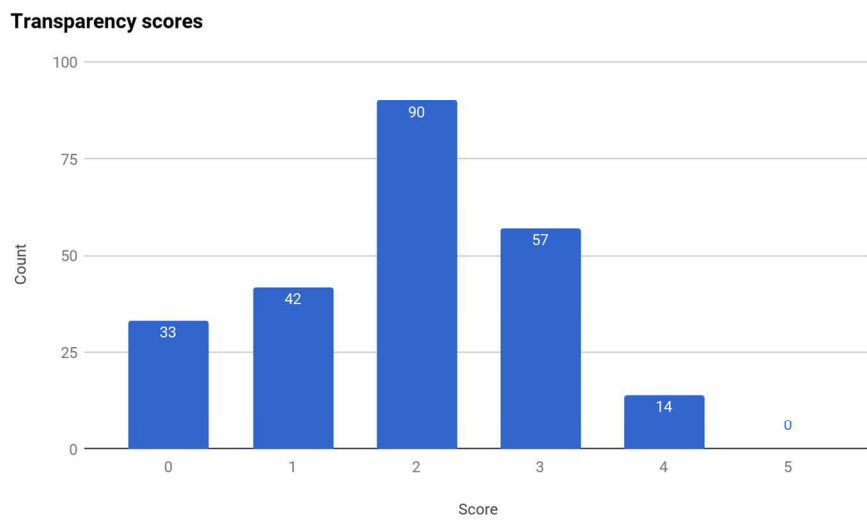

Distribution of total number of transparency criteria met, across all NHS Trusts.

254x190mm (300 x 300 DPI)

View only

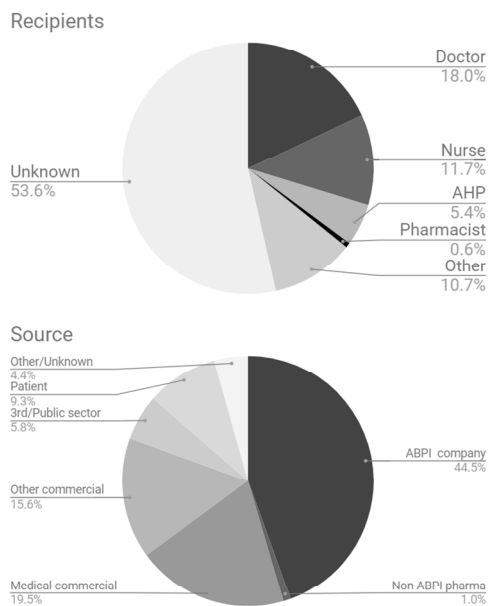

Recipients and sources of the payments disclosed in the 20 randomly selected registers we quantified.

254x190mm (300 x 300 DPI)

View only

STROBE Statement—checklist of items that should be included in reports of observational studies

|                           | Item No. | Recommendation                                                                                      | Page No.  | Relevant text from manuscript                                                                                                                                                                                                                                                                                                                                                                               |
|---------------------------|----------|-----------------------------------------------------------------------------------------------------|-----------|-------------------------------------------------------------------------------------------------------------------------------------------------------------------------------------------------------------------------------------------------------------------------------------------------------------------------------------------------------------------------------------------------------------|
| <b>Title and abstract</b> | 1        | (a) Indicate the study’s design with a commonly used term in the title or the abstract              | 1         | ‘cross-sectional’                                                                                                                                                                                                                                                                                                                                                                                           |
|                           |          | (b) Provide in the abstract an informative and balanced summary of what was done and what was found | 1         | See 354 word abstract on p1                                                                                                                                                                                                                                                                                                                                                                                 |
| <b>Introduction</b>       |          |                                                                                                     |           |                                                                                                                                                                                                                                                                                                                                                                                                             |
| Background/rationale      | 2        | Explain the scientific background and rationale for the investigation being reported                | 2         | WHAT IS ALREADY KNOWN ON THIS SUBJECT: Pharmaceutical industry gifts, hospitality and sponsorship affect the prescribing patterns of doctors. This kind of industry contact is common amongst UK doctors: GMC and other guidance requires such conflicts of interest to be reported to employers. It is not known how well this disclosure system is functioning.<br><br>See also fuller introduction on p3 |
| Objectives                | 3        | State specific objectives, including any prespecified hypotheses                                    | 1         | Objective: We set out to document how NHS trusts in the UK record and share disclosures of conflict of interest by their employees.                                                                                                                                                                                                                                                                         |
| <b>Methods</b>            |          |                                                                                                     |           |                                                                                                                                                                                                                                                                                                                                                                                                             |
| Study design              | 4        | Present key elements of study design early in the paper                                             | 1 and 3-4 | Key info in abstract; more                                                                                                                                                                                                                                                                                                                                                                                  |

|                              |    |                                                                                                                                                                                                                                                                                                                                                                                                                                                                                                                                                                                                                                                                                                                    |                 |                                                                                                                                                                                                                                             |
|------------------------------|----|--------------------------------------------------------------------------------------------------------------------------------------------------------------------------------------------------------------------------------------------------------------------------------------------------------------------------------------------------------------------------------------------------------------------------------------------------------------------------------------------------------------------------------------------------------------------------------------------------------------------------------------------------------------------------------------------------------------------|-----------------|---------------------------------------------------------------------------------------------------------------------------------------------------------------------------------------------------------------------------------------------|
|                              |    |                                                                                                                                                                                                                                                                                                                                                                                                                                                                                                                                                                                                                                                                                                                    |                 | detailed methodology section begins on p3                                                                                                                                                                                                   |
| Setting                      | 5  | Describe the setting, locations, and relevant dates, including periods of recruitment, exposure, follow-up, and data collection                                                                                                                                                                                                                                                                                                                                                                                                                                                                                                                                                                                    | 1               | Setting: NHS Trusts in England. Data collection briefly described in abstract, and in more detail pp3-4.                                                                                                                                    |
| Participants                 | 6  | <p>(a) <i>Cohort study</i>—Give the eligibility criteria, and the sources and methods of selection of participants. Describe methods of follow-up</p> <p><i>Case-control study</i>—Give the eligibility criteria, and the sources and methods of case ascertainment and control selection. Give the rationale for the choice of cases and controls</p> <p><i>Cross-sectional study</i>—Give the eligibility criteria, and the sources and methods of selection of participants</p> <p>(b) <i>Cohort study</i>—For matched studies, give matching criteria and number of exposed and unexposed</p> <p><i>Case-control study</i>—For matched studies, give matching criteria and the number of controls per case</p> | 1               | Study focussed on NHS Trusts in England.                                                                                                                                                                                                    |
| Variables                    | 7  | Clearly define all outcomes, exposures, predictors, potential confounders, and effect modifiers. Give diagnostic criteria, if applicable                                                                                                                                                                                                                                                                                                                                                                                                                                                                                                                                                                           | 6 (see also p1) | “Responded on time; Provided a register; Contained fields for named donor, named recipient and cash amount; Provided the register in a format that allowed further analysis (i.e. spreadsheet, csv);Made register publicly available online |
| Data sources/<br>measurement | 8* | For each variable of interest, give sources of data and details of methods of assessment (measurement). Describe comparability of assessment methods if there is more than one group                                                                                                                                                                                                                                                                                                                                                                                                                                                                                                                               | 1               | “responses to a Freedom of Information Act request for Gifts and Hospitality Registers [to] NHS Trusts in England...236 Trusts were contacted, of which 217 responded.                                                                      |

1  
2  
3  
4  
5  
6  
7  
8  
9  
10  
11  
12  
13  
14  
15  
16  
17  
18  
19  
20  
21  
22  
23  
24  
25  
26  
27  
28  
29  
30  
31  
32  
33  
34  
35  
36  
37  
38  
39  
40  
41  
42  
43  
44  
45  
46  
47

|            |    |                                                           |         |                                                                                                                                                                                       |
|------------|----|-----------------------------------------------------------|---------|---------------------------------------------------------------------------------------------------------------------------------------------------------------------------------------|
| Bias       | 9  | Describe any efforts to address potential sources of bias | 1 and 4 | The 236 NHS trusts in England were all contacted, removing some sources of sampling bias. Those who did not respond were contacted twice, to reduce another potential source of bias. |
| Study size | 10 | Explain how the study size was arrived at                 | 1       | Contacted all 236 NHS trusts in England.                                                                                                                                              |

Continued on next page

For peer review only



|                        |     |                                                                                                                                                                                                                                                                                                           |           |                                                                        |
|------------------------|-----|-----------------------------------------------------------------------------------------------------------------------------------------------------------------------------------------------------------------------------------------------------------------------------------------------------------|-----------|------------------------------------------------------------------------|
| Quantitative variables | 11  | Explain how quantitative variables were handled in the analyses. If applicable, describe which groupings were chosen and why                                                                                                                                                                              | 1 and 4-7 | Quantitative variables were used to give transparency scores (see p6)  |
| Statistical methods    | 12  | (a) Describe all statistical methods, including those used to control for confounding                                                                                                                                                                                                                     | 4-7       | Trusts were judged against criteria for transparency                   |
|                        |     | (b) Describe any methods used to examine subgroups and interactions                                                                                                                                                                                                                                       | 7         | Trusts with a 'zero' disclosure were compared against ABPI data        |
|                        |     | (c) Explain how missing data were addressed                                                                                                                                                                                                                                                               | 4-5       | Non-responses are noted, and seen as significant in themselves         |
|                        |     | (d) <i>Cohort study</i> —If applicable, explain how loss to follow-up was addressed<br><i>Case-control study</i> —If applicable, explain how matching of cases and controls was addressed<br><i>Cross-sectional study</i> —If applicable, describe analytical methods taking account of sampling strategy |           | N/A                                                                    |
|                        |     | (e) Describe any sensitivity analyses                                                                                                                                                                                                                                                                     |           | N/A                                                                    |
| <b>Results</b>         |     |                                                                                                                                                                                                                                                                                                           |           |                                                                        |
| Participants           | 13* | (a) Report numbers of individuals at each stage of study—eg numbers potentially eligible, examined for eligibility, confirmed eligible, included in the study, completing follow-up, and analysed                                                                                                         | 4-5       | Of the 236 trusts sent a Freedom of Information request, 217 responded |
|                        |     | (b) Give reasons for non-participation at each stage                                                                                                                                                                                                                                                      | 4-5       |                                                                        |
|                        |     | (c) Consider use of a flow diagram                                                                                                                                                                                                                                                                        |           | Not helpful here                                                       |
| Descriptive data       | 14* | (a) Give characteristics of study participants (eg demographic, clinical, social) and information on exposures and potential confounders                                                                                                                                                                  |           | N/A                                                                    |
|                        |     | (b) Indicate number of participants with missing data for each variable of interest                                                                                                                                                                                                                       | 4-7       |                                                                        |
|                        |     | (c) <i>Cohort study</i> —Summarise follow-up time (eg, average and total amount)                                                                                                                                                                                                                          |           | N/A                                                                    |
| Outcome data           | 15* | <i>Cohort study</i> —Report numbers of outcome events or summary measures over time                                                                                                                                                                                                                       |           | N/A                                                                    |
|                        |     | <i>Case-control study</i> —Report numbers in each exposure category, or summary measures of exposure                                                                                                                                                                                                      |           |                                                                        |
|                        |     | <i>Cross-sectional study</i> —Report numbers of outcome events or summary measures                                                                                                                                                                                                                        | 4-7       |                                                                        |
| Main results           | 16  | (a) Give unadjusted estimates and, if applicable, confounder-adjusted estimates and their precision (eg, 95% confidence interval). Make clear which confounders were adjusted for and why they were included                                                                                              |           | N/A                                                                    |
|                        |     | (b) Report category boundaries when continuous variables were categorized                                                                                                                                                                                                                                 |           | N/A                                                                    |
|                        |     | (c) If relevant, consider translating estimates of relative risk into absolute risk for a meaningful time period                                                                                                                                                                                          |           | N/A (relative risk not used here)                                      |

1  
2  
3  
4  
5  
6  
7  
8  
9  
10  
11  
12  
13  
14  
15  
16  
17  
18  
19  
20  
21  
22  
23  
24  
25  
26  
27  
28  
29  
30  
31  
32  
33  
34  
35  
36  
37  
38  
39  
40  
41  
42  
43  
44  
45  
46  
47

Continued on next page

For peer review only

1  
2  
3  
4  
5  
6  
7  
8  
9  
10  
11  
12  
13  
14  
15  
16  
17  
18  
19  
20  
21  
22  
23  
24  
25  
26  
27  
28  
29  
30  
31  
32  
33  
34  
35  
36  
37  
38  
39  
40  
41  
42  
43  
44  
45  
46  
47

|                   |    |                                                                                                |     |                                                                                                                                                                                                                                                                                                                                                                                                                                                                                                                                                                                                                                                                                                                                                                                                                                                                                                                                                                                         |
|-------------------|----|------------------------------------------------------------------------------------------------|-----|-----------------------------------------------------------------------------------------------------------------------------------------------------------------------------------------------------------------------------------------------------------------------------------------------------------------------------------------------------------------------------------------------------------------------------------------------------------------------------------------------------------------------------------------------------------------------------------------------------------------------------------------------------------------------------------------------------------------------------------------------------------------------------------------------------------------------------------------------------------------------------------------------------------------------------------------------------------------------------------------|
| Other analyses    | 17 | Report other analyses done—eg analyses of subgroups and interactions, and sensitivity analyses | 4-7 |                                                                                                                                                                                                                                                                                                                                                                                                                                                                                                                                                                                                                                                                                                                                                                                                                                                                                                                                                                                         |
| <b>Discussion</b> |    |                                                                                                |     |                                                                                                                                                                                                                                                                                                                                                                                                                                                                                                                                                                                                                                                                                                                                                                                                                                                                                                                                                                                         |
| Key results       | 18 | Summarise key results with reference to study objectives                                       | 1   | <p>“185 Trusts (78%) provided a register. 71 Trusts did not respond within the 28 day time limit required by the FoIA. Most COI registers were incomplete by design, and did not contain the information necessary to assess conflicts of interest. 126/185 (68%) did not record the names of recipients. 47/185 (25%) did not record the cash value of the gift or hospitality. Only 31/185 registers (16%) contained the names of recipients, the names of donors, and the cash amounts received. 18/185 (10%) contained none of: recipient name, donor name, and cash amount. Only 15 Trusts had their disclosure register publicly available online (6%). We generated a transparency index assessing whether each Trust met the following criteria: responded on time; provided a register; had a register with fields identifying donor, recipient, and cash amount; provided a register in a format that allowed further analysis; and had their register publicly available</p> |

1  
2  
3  
4  
5  
6  
7  
8  
9  
10  
11  
12  
13  
14  
15  
16  
17  
18  
19  
20  
21  
22  
23  
24  
25  
26  
27  
28  
29  
30  
31  
32  
33  
34  
35  
36  
37  
38  
39  
40  
41  
42  
43  
44  
45  
46  
47

|                          |    |                                                                                                                                                                            |     |                                                                                                                                                                                                                                                                                                  |
|--------------------------|----|----------------------------------------------------------------------------------------------------------------------------------------------------------------------------|-----|--------------------------------------------------------------------------------------------------------------------------------------------------------------------------------------------------------------------------------------------------------------------------------------------------|
|                          |    |                                                                                                                                                                            |     | online. Mean attainment was 1.9/5; no NHS trust met all five criteria.”                                                                                                                                                                                                                          |
| Limitations              | 19 | Discuss limitations of the study, taking into account sources of potential bias or imprecision. Discuss both direction and magnitude of any potential bias                 | 8   | “it is possible that Trusts which failed to respond to a FoIA request are also failing on other administrative issues, and that the absence of their disclosures may result in our study underestimating the problems with Trust registers, by only coding those from Trusts which did respond.” |
| Interpretation           | 20 | Give a cautious overall interpretation of results considering objectives, limitations, multiplicity of analyses, results from similar studies, and other relevant evidence | 8-9 |                                                                                                                                                                                                                                                                                                  |
| Generalisability         | 21 | Discuss the generalisability (external validity) of the study results                                                                                                      | 8-9 |                                                                                                                                                                                                                                                                                                  |
| <b>Other information</b> |    |                                                                                                                                                                            |     |                                                                                                                                                                                                                                                                                                  |
| Funding                  | 22 | Give the source of funding and the role of the funders for the present study and, if applicable, for the original study on which the present article is based              | 11  | “BG is funded by the Laura and John Arnold Foundation to conduct work on research integrity, but not specifically this project. No funder had any involvement in the study design or the decision to submit.”                                                                                    |

\*Give information separately for cases and controls in case-control studies and, if applicable, for exposed and unexposed groups in cohort and cross-sectional studies.

**Note:** An Explanation and Elaboration article discusses each checklist item and gives methodological background and published examples of transparent reporting. The STROBE checklist is best used in conjunction with this article (freely available on the Web sites of PLoS Medicine at <http://www.plosmedicine.org/>, Annals of Internal Medicine at <http://www.annals.org/>, and Epidemiology at <http://www.epidem.com/>). Information on the STROBE Initiative is available at [www.strobe-statement.org](http://www.strobe-statement.org).
